# Supplementary material for: Evolution of the PWWP-domain encoding genes in the plant and animal lineages
Source: PubMed Central journal article supplement (PMC3457860; doi:10.1186/1471-2148-12-101), 2012-06-26

# Additional file 7. Gene architecture of the PWWP domain containing proteins from the 12 genomes studied

| Symbols                                                                             | Domain names                                                          | Symbols                                                                             | Domain names                                                           |
|-------------------------------------------------------------------------------------|-----------------------------------------------------------------------|-------------------------------------------------------------------------------------|------------------------------------------------------------------------|
|    | PWWP domain                                                           |    | SET domain                                                             |
|    | PHD Plant homeo domain                                                |    | DAST Domain Associated with SET in Trithorax                           |
|    | Bromo_RACK7 Bromodomain                                               |    | VHS_ENTH_ANTH VHS, ENTH and NTH domain superfamily                     |
|    | EPL1 Enhancer of polycomb-like domain                                 |    | AdoMet_MTases S-adenosylmethionine-dependent methyltransferases domain |
|    | MDN1 AAA ATPase containing von Willebrand factor type A (vWA) domain  |    | Dcm Site-specific DNA methylase                                        |
|    | Chromatin binding site                                                |   | AWS domain associated with SET                                         |
|   | MutS Mismatch repair ATPase domain                                    |  | HMG High Mobility Group (HMG)-box                                      |
|   | MmsB 3-hydroxyisobutyrate and related beta-hydroxyacid dehydrogenases |  | FATC FATC domain                                                       |
|  | zf-CW CW-type Zinc Finger                                             |  | PIKKc_ATM Ataxia telangiectasia mutated catalytic domain               |
|   | Peptidase C12 Cysteine peptidase C12 containing domain                |  | SAND SAND domain                                                       |
|  | Chromo Chromatin organization modifier domain                         |  | TUDOR Tudor domain                                                     |
|   | SNF2_N SNF2 family N-terminal domain                                  |  | Tudor/PWWP/MBT superfamily domain                                      |
|   | HELICc Helicase superfamily c-terminal domain                         |  | Rubis-s Rubisco LSMT substrate-binding                                 |
|  | APC APC family of proteins                                            |                                                                                     |                                                                        |

In the following figures, each protein is represented by a rectangle proportional to the length. Positions of domains are illustrated using the symbols described above. The sizes of these symbols are not proportional to their actual size. When some regions are abbreviated for too long proteins, such regions are indicated with the following start and end position: Start  End

solo-PWWP domain proteins.

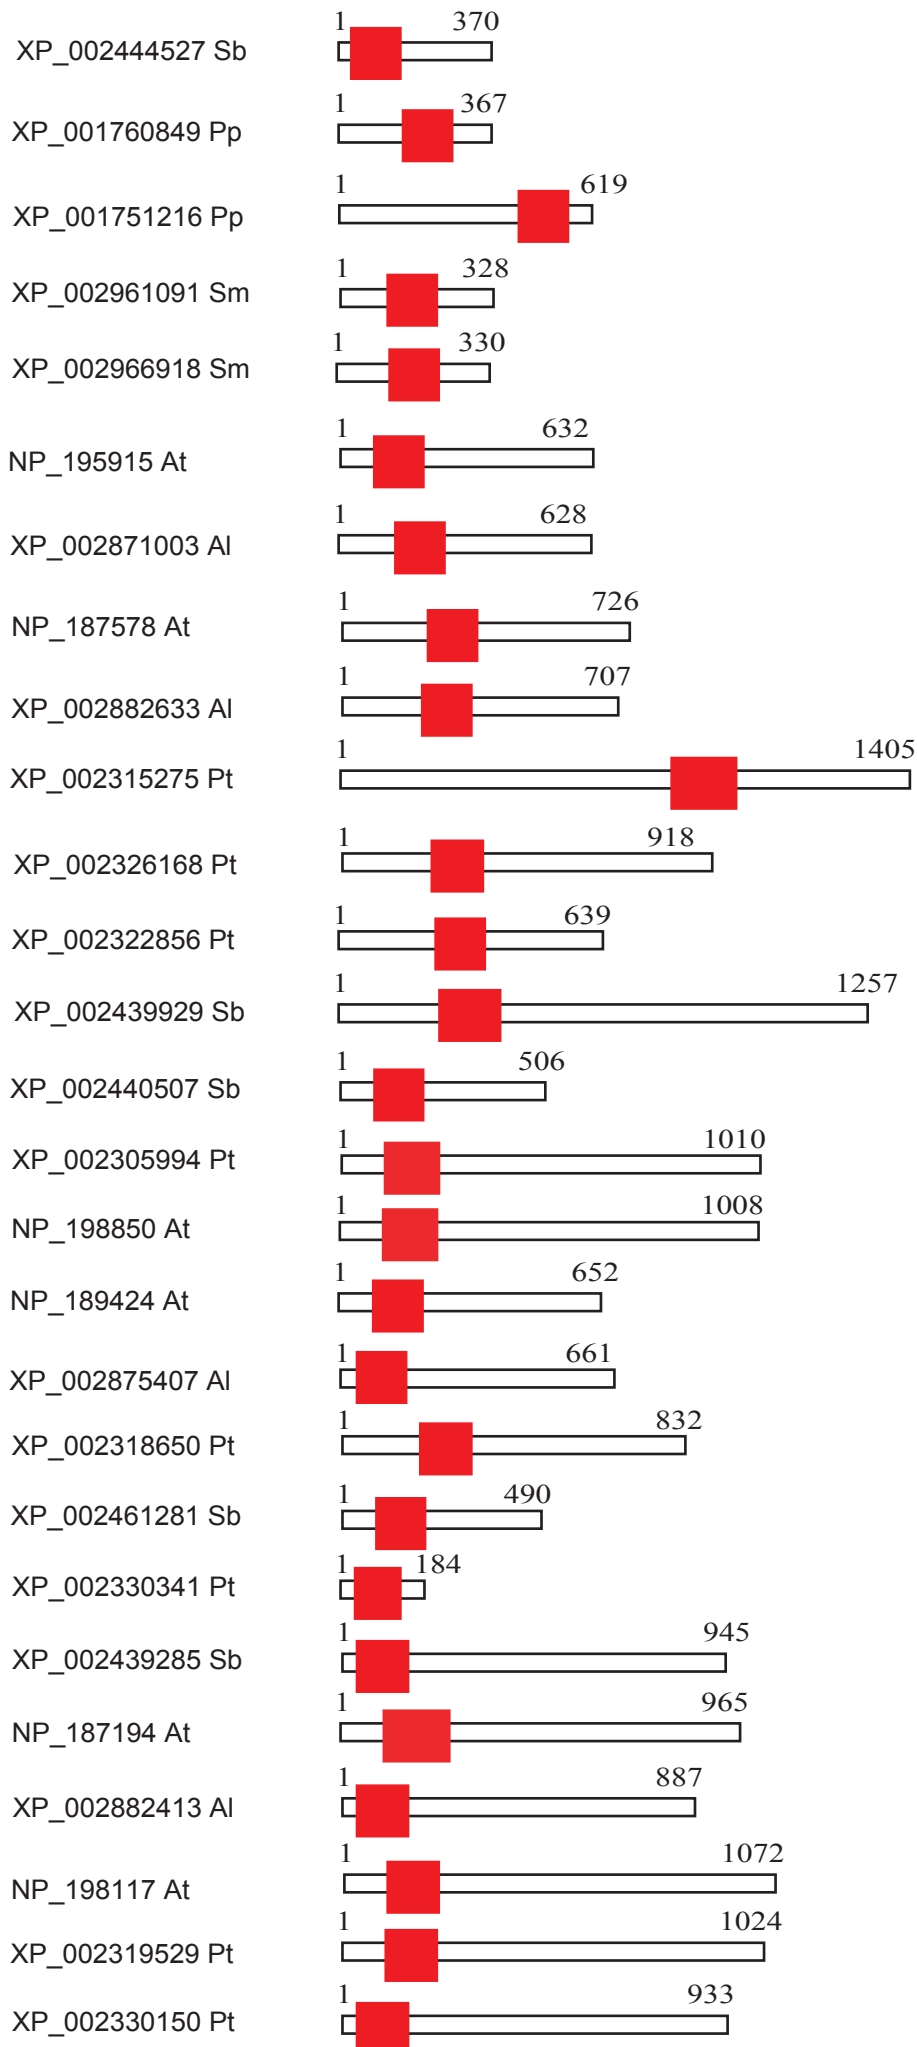

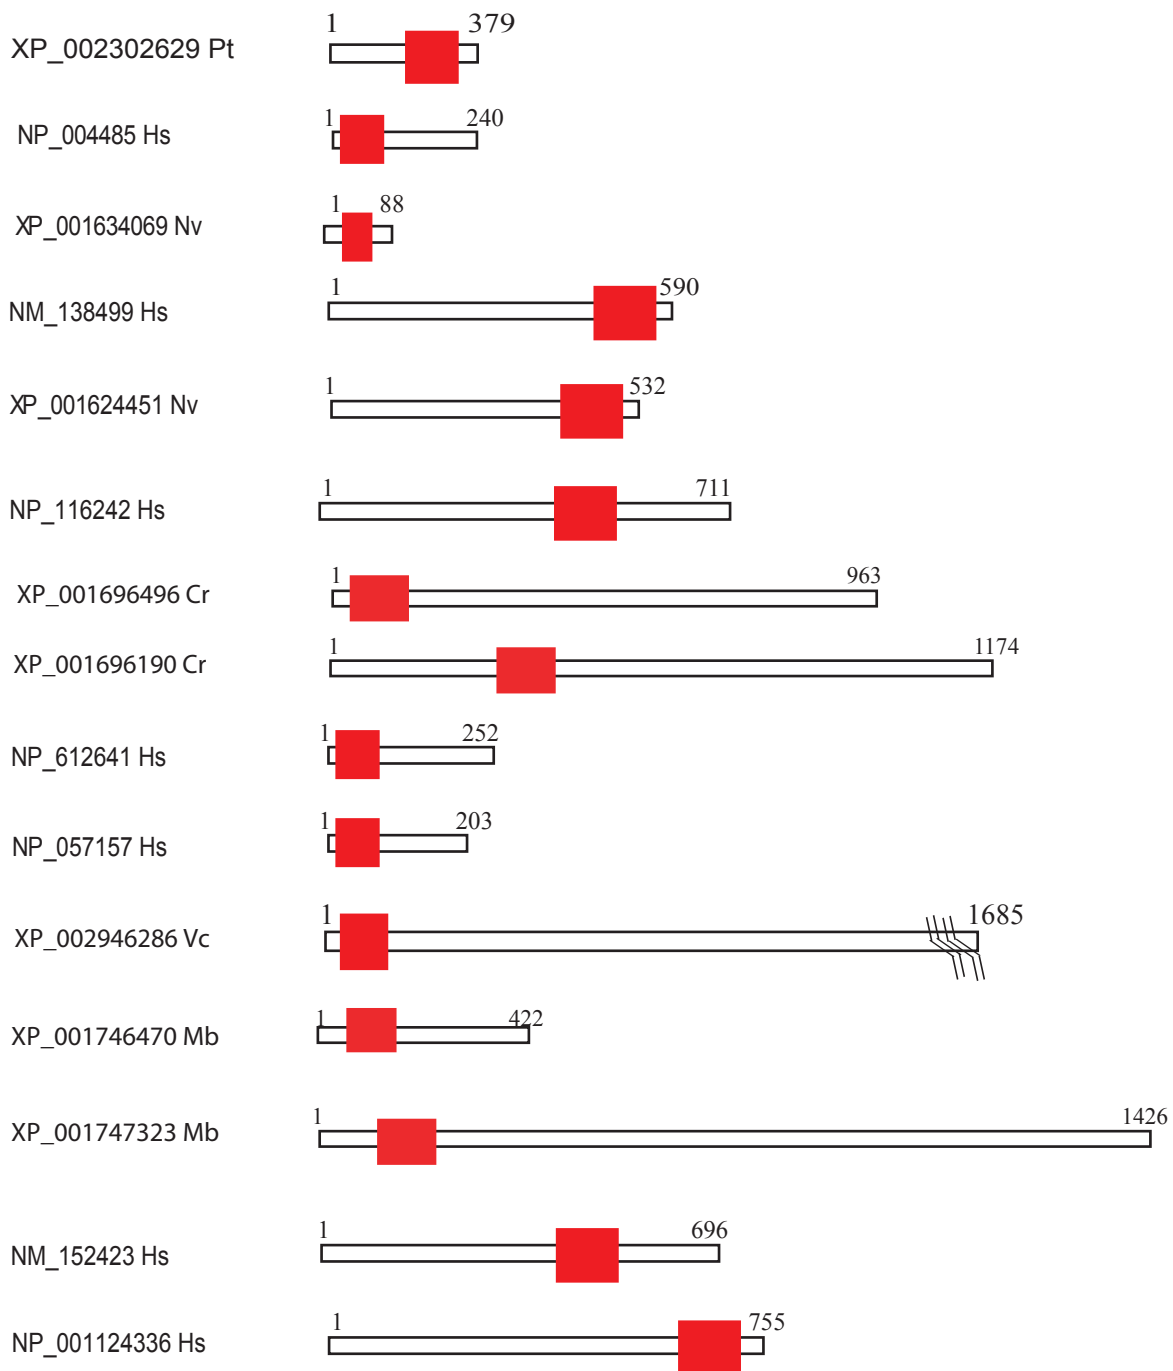

The PWWP domain in species- or lineage-specific combinations

The Chlamydomonas/Volvox SNF2 and ASH1 proteins

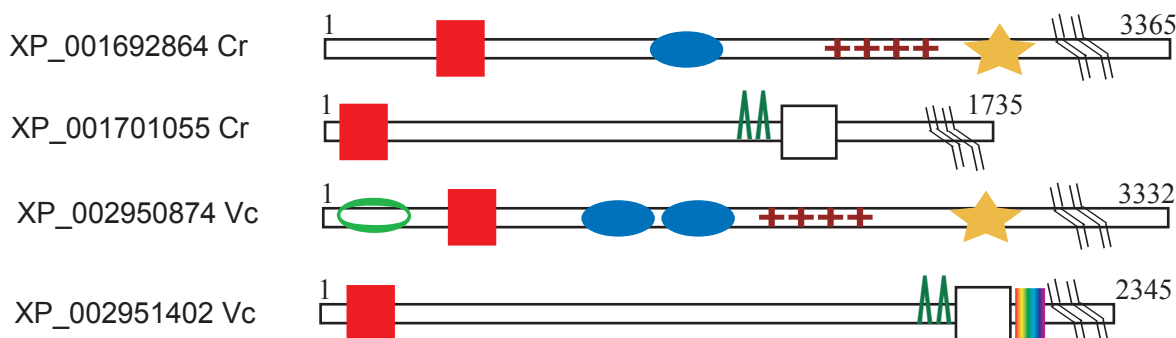

-The O.tauri SMC protein

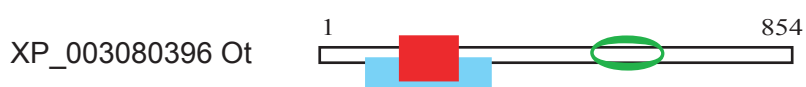

-The plant's HUAs

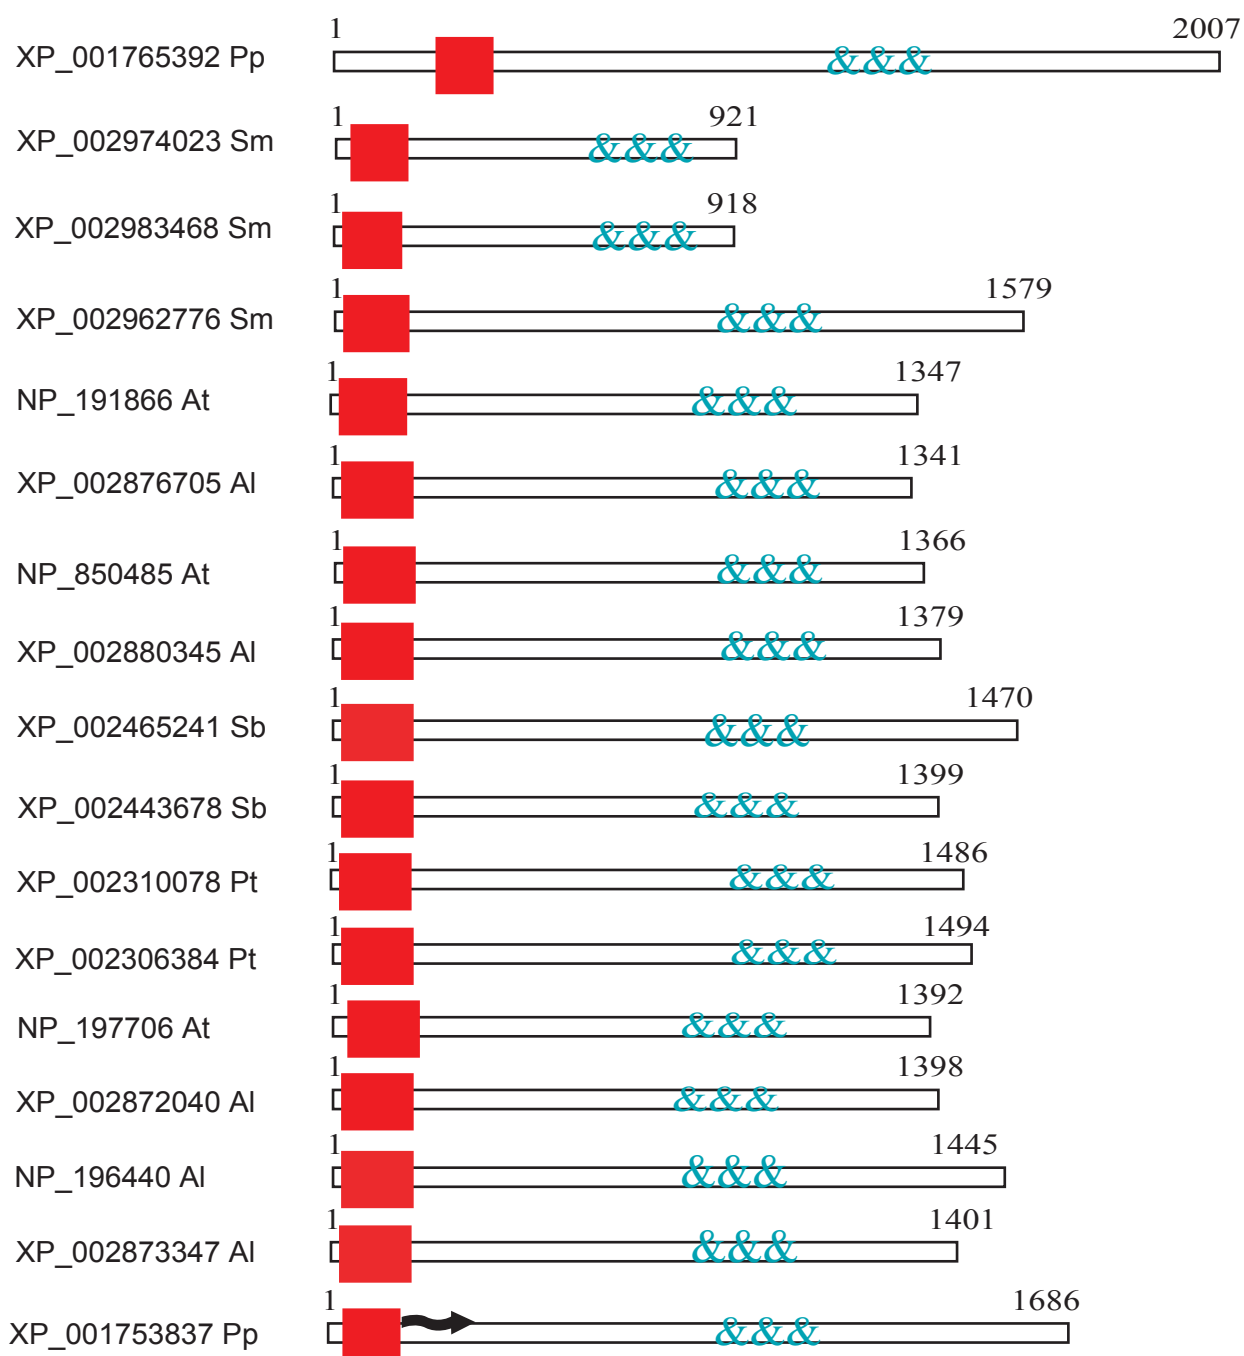

-The human-MSH6 protein

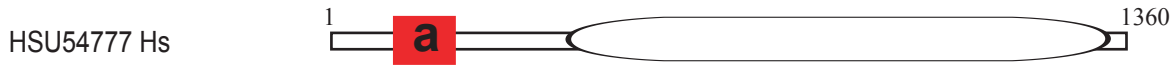

-The human GLYR protein

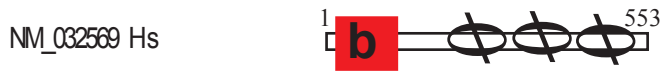

-The ZCWPW2 protein

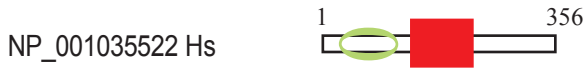

-The MUM1/EXPAND1 family

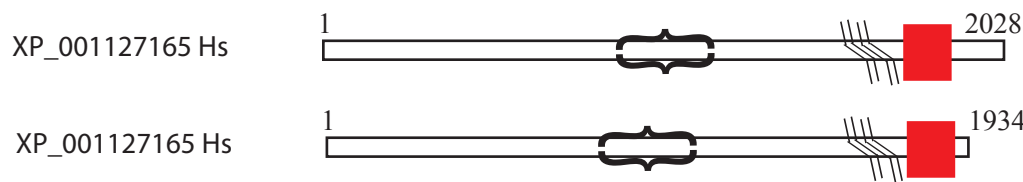

### The PWWP-domain conserved in the evolution of plant and animal lineages

-The ATX3 family

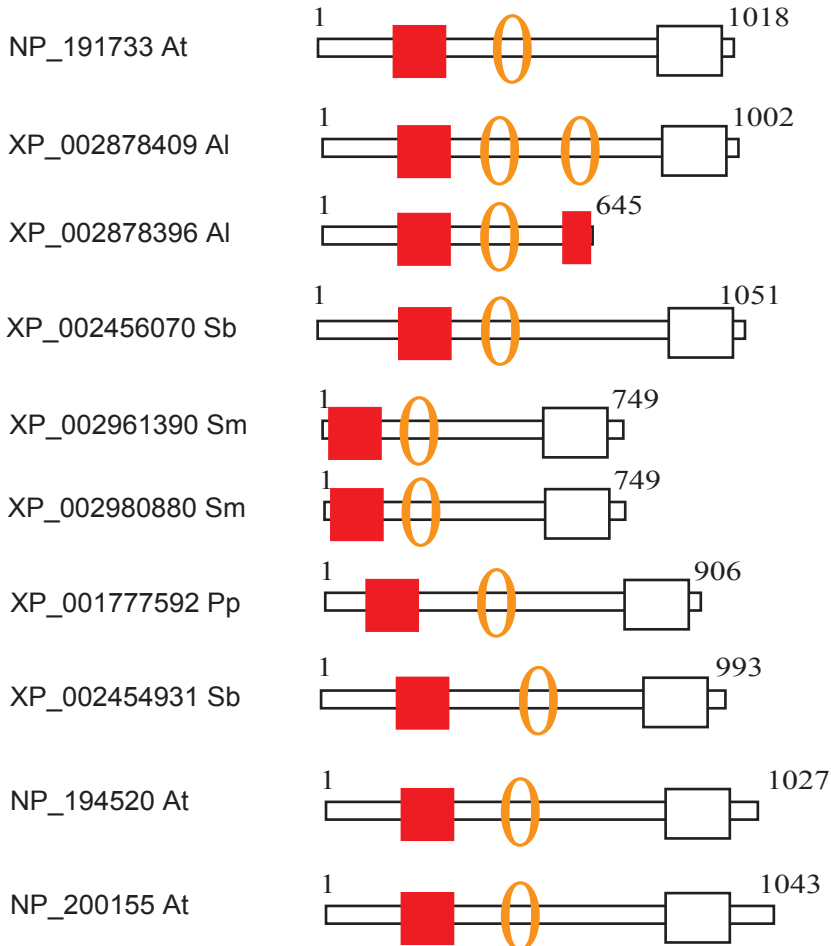

-The ATX1 family

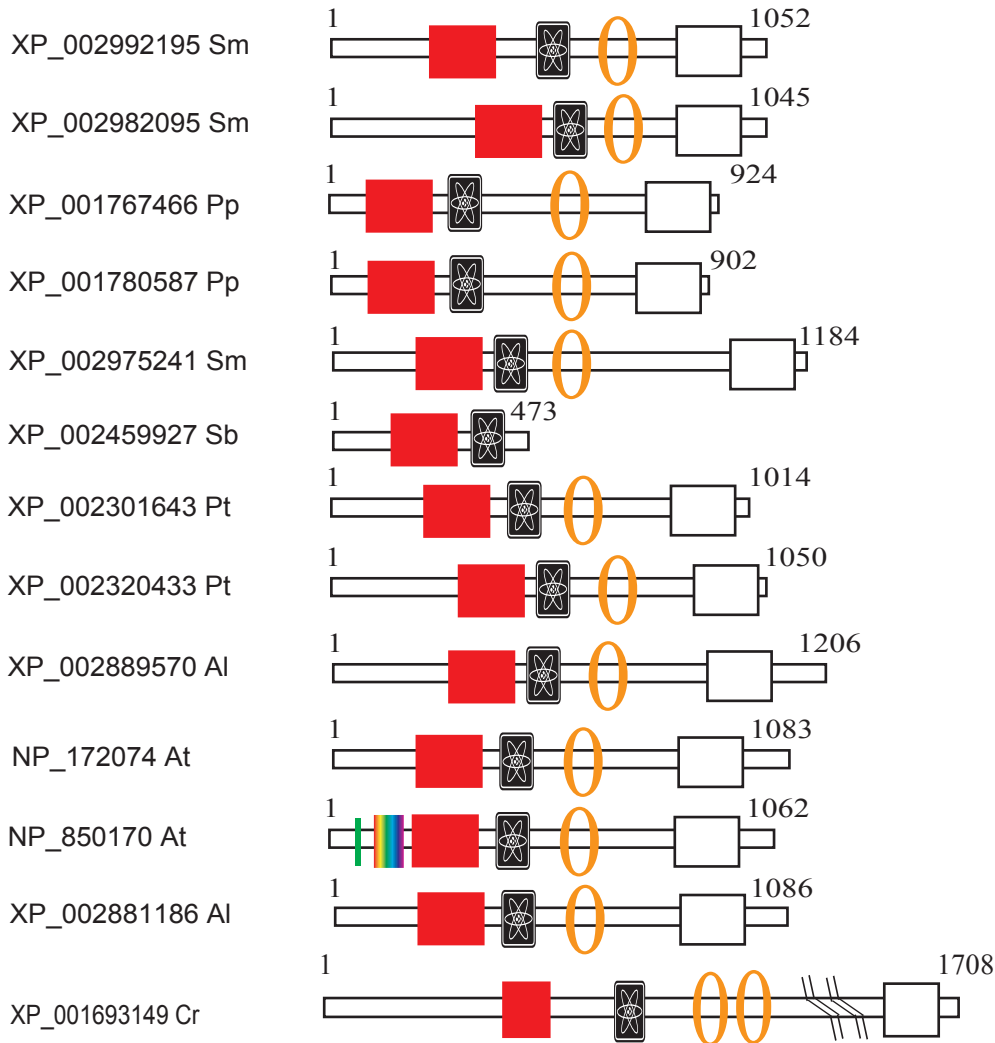

-The Peregrin-type or Brefeldin family

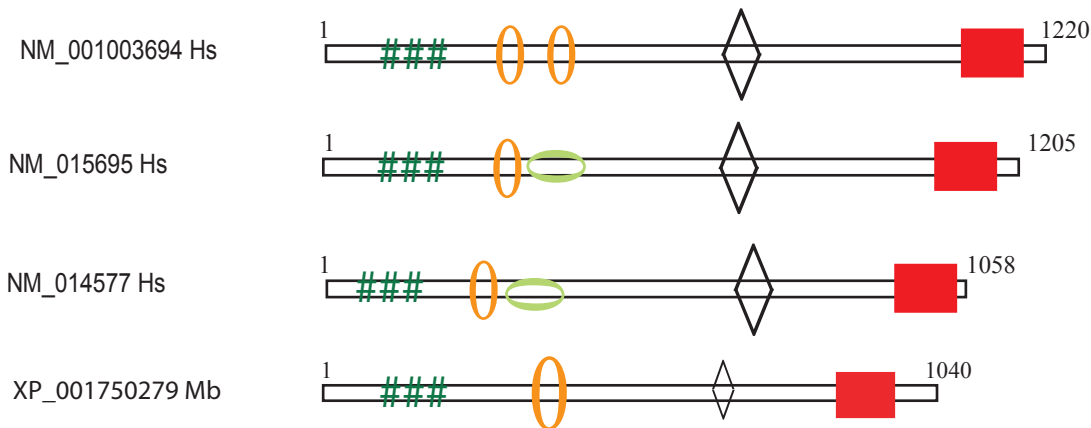

-The WHSC family

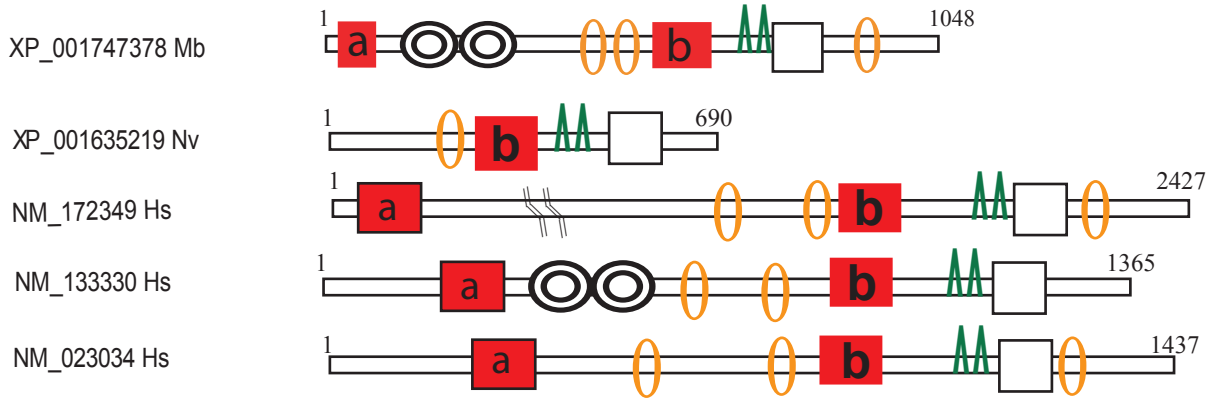

-The Z/MYND family

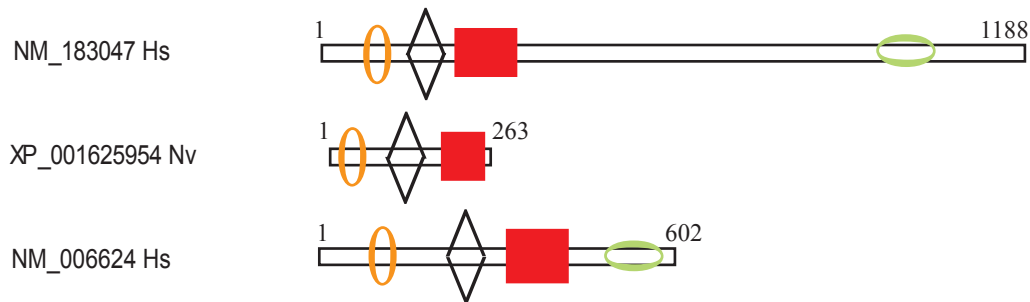

-The ZCWPW1 family

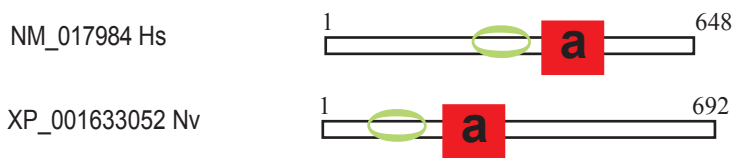

-The DNA methyltransferases

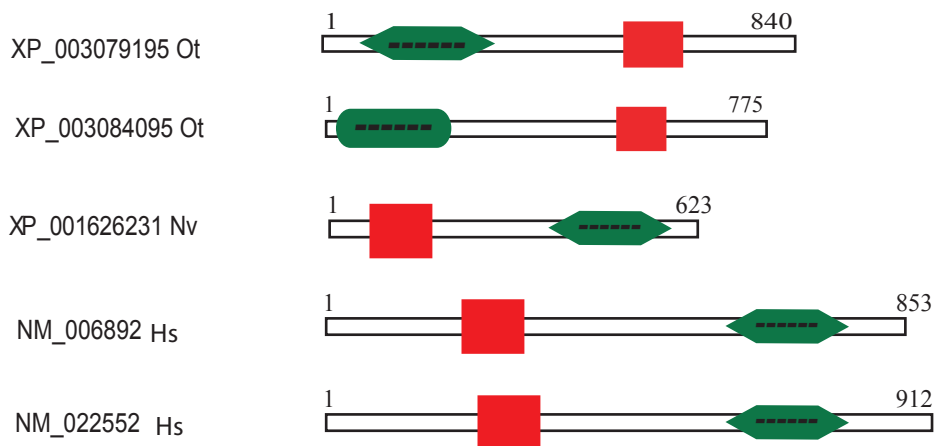

Supplement: 1471-2148-12-101-S7.pdf [file 1471-2148-12-101-S7.pdf]
