# Supplementary material for: Evolution of the PWWP-domain encoding genes in the plant and animal lineages
Source: PubMed Central journal article supplement (PMC3457860; doi:10.1186/1471-2148-12-101), 2012-06-26
Supplement: 1471-2148-12-101-S1.pdf [file 1471-2148-12-101-S1.pdf]

**Twelve genomes used in this study.**

| <b>Species</b>                                   | <b>Genome size / Gene number</b> | <b>Number of genes encoding PWWP containing proteins</b> | <b>Genome sequencing / Version number</b>                                                                                                     | <b>Reference</b>                                                                                                                              |
|--------------------------------------------------|----------------------------------|----------------------------------------------------------|-----------------------------------------------------------------------------------------------------------------------------------------------|-----------------------------------------------------------------------------------------------------------------------------------------------|
| <i>Arabidopsis thaliana</i> (At)*                | 119.67 Mb / 33,583               | 16                                                       | Assembly Name TAIR9                                                                                                                           | <a href="http://www.ncbi.nlm.nih.gov/genome/?term=Arabidopsis%20TAIR10">http://www.ncbi.nlm.nih.gov/genome/?term=Arabidopsis%20TAIR10</a>     |
| <i>Arabidopsis lyrata</i> (Al)                   | 207.0 Mb / 32,670                | 14                                                       | US DOE Joint Genome Institute Program CSP 2006                                                                                                | <a href="http://genome.jgi-psf.org/programs/plants/plant-projects.jsf">http://genome.jgi-psf.org/programs/plants/plant-projects.jsf</a>       |
| <i>Sorghum bicolor</i> (Sb)                      | 698.2 Mb / 33,080                | 10                                                       | Assembly Name Sorbi 1                                                                                                                         | <a href="http://www.ncbi.nlm.nih.gov/genome?term=txid4558%5Borgn%5D">http://www.ncbi.nlm.nih.gov/genome?term=txid4558%5Borgn%5D</a>           |
| <i>Populus trichocarpa</i> (Pt)                  | 427.47 Mb / 42,965               | 15                                                       | Assembly name Poptr1_1                                                                                                                        | <a href="http://www.ncbi.nlm.nih.gov/genome?term=txid3694%5Borgn%5D">http://www.ncbi.nlm.nih.gov/genome?term=txid3694%5Borgn%5D</a>           |
| <i>Physcomitrella patens</i> (Pp)                | 480.0 Mb / 32,272                | 7                                                        | US DOE Joint Genome Institute Program CSP 2009                                                                                                | <a href="http://genome.jgi-psf.org/programs/plants/plant-projects.jsf">http://genome.jgi-psf.org/programs/plants/plant-projects.jsf</a>       |
| <i>Selaginella moellendorffii</i> (Sm)           | 212.5 Mb / 22,273                | 10                                                       | US DOE Joint Genome Institute Program CSP 2005                                                                                                | <a href="http://genome.jgi-psf.org/programs/plants/plant-projects.jsf">http://genome.jgi-psf.org/programs/plants/plant-projects.jsf</a>       |
| <i>Chlamydomonas reinhardtii</i> CC-503 (Cr)     | 105.19 Mb / 14,354               | 5                                                        | <a href="http://www.ncbi.nlm.nih.gov/Taxonomy/Browser/wwwtax.cgi?id=3055">http://www.ncbi.nlm.nih.gov/Taxonomy/Browser/wwwtax.cgi?id=3055</a> | <a href="http://www.ncbi.nlm.nih.gov/Taxonomy/Browser/wwwtax.cgi?id=3055">http://www.ncbi.nlm.nih.gov/Taxonomy/Browser/wwwtax.cgi?id=3055</a> |
| <i>Volvox carteri</i> f. <i>Nagariensis</i> (Vc) | 120 Mb / 14,437                  | 4                                                        | US DOE Joint Genome Institute Program DOEM 2005                                                                                               | <a href="http://genome.jgi-psf.org/programs/plants/plant-projects.jsf">http://genome.jgi-psf.org/programs/plants/plant-projects.jsf</a>       |

|                                                                 |                        |    |                                                       |                                                                                                                                              |
|-----------------------------------------------------------------|------------------------|----|-------------------------------------------------------|----------------------------------------------------------------------------------------------------------------------------------------------|
| <i>Ostreococcus tauri</i><br>OTH95 RCC745-2009<br>( <i>Ot</i> ) | 12.56 Mb /<br>8,166    | 5  | US DOE JGIP Program CSP<br>2010                       | <a href="http://genome.jgi-psf.org/programs/plants/plant-projects.jsf">http://genome.jgi-psf.org/programs/<br/>plants/plant-projects.jsf</a> |
| <i>Homo sapiens</i><br>( <i>Hs</i> )                            | 3095.69 Mb<br>/ 36,073 | 24 | Human Genome Project -<br>Assembly GRCh37.p7          | <a href="http://www.ncbi.nlm.nih.gov/genome/guide/human/">http://www.ncbi.nlm.nih.gov/genome/<br/>guide/human/</a>                           |
| <i>Nematostella vectensis</i><br>( <i>Nv</i> )                  | 450 Mb /<br>18,000     | 6  | US DOE Joint Genome<br>Institute Program DOEM<br>2004 | <a href="http://genome.jgi-psf.org/programs/plants/plant-projects.jsf">http://genome.jgi-psf.org/programs/<br/>plants/plant-projects.jsf</a> |
| <i>Monosiga brevicollis</i><br>MX1<br>( <i>Mb</i> )             | 41.6 Mb /<br>9,200     | 4  | US DOE Joint Genome<br>Institute Program DOEM<br>2003 | <a href="http://genome.jgi-psf.org/programs/plants/plant-projects.jsf">http://genome.jgi-psf.org/programs/<br/>plants/plant-projects.jsf</a> |

---

\* abbreviations for the species shown in brackets
