# Supplementary material for: Evolution of the PWWP-domain encoding genes in the plant and animal lineages
Source: PubMed Central journal article supplement (PMC3457860; doi:10.1186/1471-2148-12-101), 2012-06-26
Supplement: 1471-2148-12-101-S3.pdf [file 1471-2148-12-101-S3.pdf]

| GenBank locus tag <i>A. thaliana</i> | Protein ID <i>A. thaliana</i> |
|--------------------------------------|-------------------------------|
| AT3G05430                            | NP_187194                     |
| AT5G27650                            | NP_198117                     |
| AT5G40340                            | NP_198850                     |
| AT3G27860                            | NP_189424                     |
| AT3G09670                            | NP_187578                     |
| AT5G02950                            | NP_195915                     |
| AT3G48190                            | NP_190402                     |
| AT5G53430                            | NP_200155                     |
| AT4G27910                            | NP_194520                     |
| AT3G61740                            | NP_191733                     |
| AT2G31650                            | NP_850170                     |
| AT1G05830                            | NP_172074                     |
| AT3G63070                            | NP_191866                     |
| AT2G48160                            | NP_850485                     |
| AT5G23150                            | NP_197706                     |
| AT5G08230                            | NP_196440                     |

| GenBank locus tag <i>A. lyrata</i> | Protein ID <i>A. lyrata</i> |
|------------------------------------|-----------------------------|
| ARALYDRAFT_902198                  | XP_002881186                |
| ARALYDRAFT_311665                  | XP_002889570                |
| ARALYDRAFT_907732                  | XP_002878409                |
| ARALYDRAFT_907712                  | XP_002878396                |
| ARALYDRAFT_918421                  | XP_002864242                |
| ARALYDRAFT_913734                  | XP_002869532                |
| ARALYDRAFT_484576                  | XP_002875407                |
| ARALYDRAFT_489171                  | XP_002872040                |
| ARALYDRAFT_487657                  | XP_002873347                |
| ARALYDRAFT_486811                  | XP_002876705                |
| ARALYDRAFT_484006                  | XP_002880345                |
| ARALYDRAFT_323420                  | EFH52141                    |
| ARALYDRAFT_324953                  | EFH47262                    |
| ARALYDRAFT_317405                  | XP_002882413                |

Additional File 3. The genome of *A. thaliana* was examined with the PWWP domain sequence of the ATX1 protein as a probe, and 16 genes were identified encoding PWWP-containing proteins. The fourteen genes encoding PWWP-containing proteins in *A. lyrata* were identified by BLAST analysis with the *A. thaliana* sequences.
