# Supplementary material for: Evolution of the PWWP-domain encoding genes in the plant and animal lineages
Source: PubMed Central journal article supplement (PMC3457860; doi:10.1186/1471-2148-12-101), 2012-06-26
Supplement: 1471-2148-12-101-S6.pdf [file 1471-2148-12-101-S6.pdf]

**Additional file 6.** Multiple sequence alignments used for generating the phylogenetic trees in this study.

Multiple sequence alignment of *Arabidopsis thaliana* and *Arabidopsis lyrata* PWWP-domain containing sequences. The multiple sequence alignment was used to reconstruct the maximum likelihood (Fig. 3) phylogeny.

```

NP_190402_ATMlike_At_AT3G48190      -----GNLVVWMTKY-KKWWPGEVVDV--KADAKES-----
EFH52141_Alyrata                    -----GNLVVWMTKY-KKWWPGEVVDV--KADAKES-----
NP_195915_At_AT5G02950              -----DLVWAKLRS-YPWWPGLVFDK--SVASKAAMRHF
EFH47262_Alyrata                    -----DLVWAKIRS-YPWWPGQVIDA--SVASKAAKKHF
BAF01554_At_At3g09670              --ISDSDLVWAKVRS-HPWWPGQVFDV--SAATDKAKKHF
NP_187194_At_AT3G05430              --FEVGDMVWGVKVS-HPWWPGQIFNE--AFASPSVRRVK
XP_002882413_Alyrata                --FEVGDMVWGVKVS-HPWWPGQIFNE--AFASPSVRRMK
NP_198117_At_AT5G27650              --FEVGDVWGVKVS-HPWWPGHIFNE--AFASPSVRRMR
NP_189424_At_AT3G27860              --FHVGDVWGVKEANSQQWWPGQIYDS--LDASDLALKTM
XP_002875407_Alyrata                --FHVGDVWGVKEVNSQQWWPGQIYDS--LDASDLALKTM
NP_198850_At_AT5G40340              -----GDFVWGKIKN-HPWWPGQIYDP--SDASDLALKIK
XP_002878396_firstPWWP_Alyrata      -----PAWPAMVVDV--ISQAPDGVLLKH
XP_002878396_secondPWWP_Alyrat      -----RSQAPTAVLLKH
XP_002878409_Alyrata                --FTVGDVWAKCGKRFPWPAVVIDP--ISQAPDGVLLKH
NP_191733_ATX3_WHCS1r_AT3G6174      --FTVGDVWAKCGKRFPWPAVVIDP--ISQAPDGVLLKH
NP_194520_ATX4_WHCS1r_AT4G2791      --FYSGDLVWAKSGRNEPFWPAIVIDP--MTQAPELVLR
XP_002869532_Alyrata                --FYSGDLVWAKSGRNEPFWPAIVIDP--MTQAPELVLR
NP_200155_ATX5_At_AT5G53430         --FYSGDLVWKGSGRNEPFWPAIVIDP--MTQAPELVLR
XP_002864242_Alyrata                --FYSGDLVWKGSGRKEPFWPAIVIDP--MTQAPELVLR
NP_850170_ATX1_At2g31650            --FEPGDIVWAKLAG-HAMWPAVIVDESIVGERKGLNNKV
XP_002881186_Alyrata                --FETGDIVWAKLAG-HAMWPAVIVDESIVGERKGLNNKV
NP_172074_ATX2_AT1G05830            --FEPRDIWAKLTG-HAMWPAIVDESIVVKKRGLNNKI
XP_002889570_Alyrata                --FEPRDIWAKLTG-HAMWPAIVDESIVVKKRGLNNKA
NP_191866_At_HDGFr_AT3G63070        -EWKVGDVVLAKVKG-FPAWPVVDEP-----EKWG-HS
NP_850485_At_HDGFr_At2g48160        -----GDLVLAKVKG-FPAWPVVSEP-----EKWD-AS
XP_002880345_Alyrata                -KWKVGDVVLAKVKG-FPAWPAVSEP-----EKWG-AL
XP_002876705_Alyrata                ---KVGDLVLAKVKG-FPAWPAVVSQP-----EKWG-YS
NP_197706_HUA2_At_HDGFr_AT5G23      -QLVLGDLVLAKVKG-FPAWPAKISR-----EDWD-RA
XP_002872040_Alyrata                GQLILGDLVLAKVKG-FPAWPAKISR-----EDWD-RA
NP_196440_At_AT5G08230              GEMRLGDLVLAKVKG-FPAWPAKIGQP-----EDWN-QA
XP_002873347_Alyrata                --LRLGDLVLAKVKG-FPAWPAKIGQP-----EDWN-QA

```

```

NP_190402_ATMlike_At_AT3G48190      -----FMVRSIG-----QSHLVSWFASSKLPFKESFEQ
EFH52141_Alyrata                    -----FMVRYIG-----QSHLVSWFAPLKLKPFKESFEQ
NP_195915_At_AT5G02950              KK-GNVLVAYFG-----DCTFA-WNNASQIKPFHQNFSQ
EFH47262_Alyrata                    KKKGNLLVAYFG-----DCTFA-WNNASQVQKPFHQNFSQ
BAF01554_At_At3g09670              KK-GSFLVTYFG-----DCTFA-WNEASRIKPFHQHFSQ
NP_187194_At_AT3G05430              KM-GYVLVAFFG-----DNSYG-WFDPAELIPFEPHVKE
XP_002882413_Alyrata                KM-GYVLVAFFG-----DNSYG-WFDPAELLPFEPHVAE
NP_198117_At_AT5G27650              RI-DHVLVAFFG-----DSSYG-WFDPAELIPFEPNLEE
NP_189424_At_AT3G27860              QK-GKLLVAYFG-----DGSFFGWCNPLELKPFLFNFK
XP_002875407_Alyrata                QK-GKLLVAYFG-----DGKFC-WCNPLELKPFLFNFK
NP_198850_At_AT5G40340              QK-GKLLVACFG-----DGTFA-WCGASQLKPFPAESFKE
XP_002878396_firstPWWP_Alyrata      CVPGAICVMFFGYSKNGTQRDYA-WVRQGMVYPFTEFMDK

```

XP\_002878396\_secondPWWP\_Alyrat  
XP\_002878409\_Alyrata  
NP\_191733\_ATX3\_WHCS1r\_AT3G6174  
NP\_194520\_ATX4\_WHCS1r\_AT4G2791  
XP\_002869532\_Alyrata  
NP\_200155\_ATX5\_At\_AT5G53430  
XP\_002864242\_Alyrata  
NP\_850170\_ATX1\_At2g31650  
XP\_002881186\_Alyrata  
NP\_172074\_ATX2\_AT1G05830  
XP\_002889570\_Alyrata  
NP\_191866\_At\_HDGFr\_AT3G63070  
NP\_850485\_At\_HDGFr\_At2g48160  
XP\_002880345\_Alyrata  
XP\_002876705\_Alyrata  
NP\_197706\_HUA2\_At\_HDGFr\_AT5G23  
XP\_002872040\_Alyrata  
NP\_196440\_At\_AT5G08230  
XP\_002873347\_Alyrata

CVPGAICVMFFGYLKNGTQSDYA-RVRQGMMPFTEFMDK  
CVPGAICVMFFGYSKDGTQRDYA-WVRQGMMPFTEFMDK  
CVPGAICVMFFGYSKDGTQRDYA-WVRQGMVYPFTEFMDK  
CIPDAACVVFVFGHSGNENERDYA-WVRRGMIFPFVDYVAR  
CIPDAACVVFVFGHSGNENERDYA-WVRRGMIFPFVDYVAR  
CIPDAACVVFVFGHSGTENERDYA-WVRRGMIFPFVDYVER  
CIPDAACVVFVFGHSGTENERDYA-WVRRGMIFPFVDYVDR  
SGGGSLLVQFFG-----THDFA-RIKVKQAISFIKGLLS  
SGGGSLLVQFFG-----THDFA-RIKEKQAISFIKGLLS  
SGGRSVLVQFFG-----THDFA-RIQVKQAVSFLKGLLS  
SGGRSVLVQFFG-----THDFA-R-----  
ADSKKVTVHFFG-----TQQIA-FCNHGDVESFTEEKQ  
PDSKKVFVHFFG-----TQQIA-FCNPGDVEAFTEERKQ  
TDLKKVFVHFFG-----TQQIA-FCNHTDVEAFDERKQ  
ADSKKVLVHFFG-----TQQIA-LCNPADVESFTEEKQ  
PDPKKYFVQFFG-----TEEIA-FVAPPDIQAFITSEAKS  
PDPKKYFVQFFG-----TEEIA-FVAPPDIQAFITSEAKS  
PDPKKHFVQFYG-----TGEIG-FVTPPDIQPFITSETKK  
PDPKKHFVQFFG-----TQEIG-FVAPPDIQPFITSEAKN

NP\_190402\_ATMlike\_At\_AT3G48190  
EFH52141\_Alyrata  
NP\_195915\_At\_AT5G02950  
EFH47262\_Alyrata  
BAF01554\_At\_At3g09670  
NP\_187194\_At\_AT3G05430  
XP\_002882413\_Alyrata  
NP\_198117\_At\_AT5G27650  
NP\_189424\_At\_AT3G27860  
XP\_002875407\_Alyrata  
NP\_198850\_At\_AT5G40340  
XP\_002878396\_firstPWWP\_Alyrata  
XP\_002878396\_secondPWWP\_Alyrat  
XP\_002878409\_Alyrata  
NP\_191733\_ATX3\_WHCS1r\_AT3G6174  
NP\_194520\_ATX4\_WHCS1r\_AT4G2791  
XP\_002869532\_Alyrata  
NP\_200155\_ATX5\_At\_AT5G53430  
XP\_002864242\_Alyrata  
NP\_850170\_ATX1\_At2g31650  
XP\_002881186\_Alyrata  
NP\_172074\_ATX2\_AT1G05830  
XP\_002889570\_Alyrata  
NP\_191866\_At\_HDGFr\_AT3G63070  
NP\_850485\_At\_HDGFr\_At2g48160  
XP\_002880345\_Alyrata  
XP\_002876705\_Alyrata  
NP\_197706\_HUA2\_At\_HDGFr\_AT5G23  
XP\_002872040\_Alyrata  
NP\_196440\_At\_AT5G08230  
XP\_002873347\_Alyrata

VLNQ-----RNDNGFFDALQKA-----  
VLNQ-----RNDKGGFFDAVEKA-----  
MQEQ-----SNSAEFRDAIDCALDE-----  
MQEQ-----SNLAEFRDAIDCALDE-----  
MAKQ-----SSLPDFIDAIDFALEE-----  
KSQQ-----TSSDHFAKAVEEAMNE-----  
NSQQ-----TSSGHFAKAVEEAMDE-----  
KSQQQ-----TVSKHFVRAVEEAKDE-----  
FSKM-----SDSRRFLLAVEDA-----  
FSKM-----SESKRFLSAVEEA-----  
CSKV-----SNSRSFLGAVEEAVEE-----  
FQDKTNLYNYKPSEFFKKALDEAVLAENG-----  
-----  
FQDQTNLYNYKPSEFFKKALEEAVLAENG-----  
FQDQTNLNFNYKASEFNKALEEAVLAENGN-----  
FQEQPELQGCCKPGNFQMALEEAFLADQGF-----  
FQEQSELQGCCKPGNFQMALEEAFLADQGF-----  
LQEQSELRGCNPRDFQMALEEAFLADQGF-----  
FQEQSELRGCNPREFQMALEEAFLADQGF-----  
PSHLK-CKQ--PR-FEEGMQEA-----  
PSHLK-CKQ--PR-FEEGMQEA-----  
RSPLK-CKQ--PR-FEEAMEEA-----  
-----  
SLLTR-RHAKGSD-FVRVAVKEITES-----  
SLLTR-RHAKGSD-FVRVAVKEIIES-----  
SLLTK-RHAKGSD-FLRAVKEIIES-----  
LLLTK-RHAKGSD-FVRVAVKEITES-----  
KLLAR-CQGKTVKYFAQAVEQICTA-----  
KLLAR-CQGKTVKYFAQAVEQICTA-----  
KLSAR-CQGKTVKYFSQAVEEIE-----  
KLLAR-CQGKTVKYFSQAVEEIE-----

Multiple sequence alignment of plant PWWP-domain containing sequences. The multiple sequence alignment was used to reconstruct the neighbor joining (Fig. 4) phylogeny.

```

NP_850170_ATX1_At2g31650      -----FEPGDIVWAKLAG--HAMWPAVIV
XP_002881186_Alyrata          -----FETGDIVWAKLAG--HAMWPAVIV
NP_172074_ATX2_AT1G05830     -----FEPRDIWAKLTG--HAMWPAIIV
XP_002301643_Populus         -----LEPGDIWAKLTG--HAMWPAIVV
XP_002320433_Populus         -----PGDIWAKVTG--HAMWPAIVV
XP_002889570_Alyrata         -----FEPRDIWAKLTG--HAMWPAIIV
XP_002459927_Sorghum        -----PGDLVWAKITG--HAMWPAVVV
XP_002992195_Selaginella     -----GTVVWAKVKG--WPMWPAVLV
XP_002982095_Selaginella     DELALLANEMESFEEQISHGTVVWAKVKG--WPMWPAVLV
XP_001767466_Physcomitrella   -----GDLVWAKVKG--WPMWPAFVM
XP_001780587_Physcomitrella   -----GDLVWAKVKG--WPMWPAFVM
XP_002975241_Selaginella     -----FQHGDIVWAEETPG--YPMWPAFVM
XP_001760849_Physcomitrella   -----FKHGQLVWAKFAR--FPWWPAEII
XP_001751216_Physcomitrella   -----GQLVWAKFAR--FPWWPAEII
XP_002961091_Selaginella     -----SAGQLVWAKFSR--SPWWPAQVA
XP_002966918_Selaginella     -----SAGQLVWAKFSR--SPWWPAQVA
XP_002444527_Sorghum        -----FRLGDIWVKCSG--SSWWPAQVI
NP_189424_At_AT3G27860       -----FHVGFDFVWGEEANS--QQWWPGQIY
XP_002875407_Alyrata         -----FHVGFDFVWGKEVNS--QQWWPGQIY
NP_198850_At_AT5G40340       -----GDFVWGKIKN--HPWWPGQIY
XP_002305994_Populus         -----FRVGDFVWGKIKS--HPWWPGRVY
NP_195915_At_AT5G02950       -----DLVWAKLRS--YPMWPGLVF
XP_002871003_Alyrata         -----DLVWAKIRS--YPMWPGQVI
NP_187578_At_At3g09670       -----ISDSDLVWAKVRS--HPWWPGQVF
XP_002882633_Alyrata         -----ISDSDLVWAKVRS--HPWWPGQVF
XP_002326168_Populus         -----LSVGDVWVKVRS--HPWWPGQVF
XP_002322856_Populus         -----GDLVWVKVRS--HPWWPGQLF
XP_002315275_Populus         -----FVSVDVWVKVRS--HPWWPGQIF
XP_002439929_Sorghum        -----DLVWVKVRS--HPWWPGEIF
XP_002440507_Sorghum        -----PGRVWVKVRS--HPWWPAQVF
XP_002318650_Populus         -----FHVGDIVWVKTKN--QSWWPGKIF
XP_002461281_Sorghum        -----FAPGDMVWVKKLN--HAAWPGLIY
NP_187194_At_AT3G05430       -----FEVGDVWVKVRS--HPWWPGQIF
XP_002882413_Alyrata         -----FEVGDVWVKVRS--HPWWPGQIF
XP_002319529_Populus         -----FEVGDVWVKVRS--HPRWPGHIF
XP_002330150_Populus         -----FEVGDVWVKVRS--HPWWPGHIF
NP_198117_At_AT5G27650       -----FEVGDVWVKVRS--HPWWPGHIF
XP_002330341_Populus         -----
XP_002439285_Sorghum        -----PRFGDMVWVKVRS--HPWWPGHIY
NP_191866_At_HDGFr_AT3G63070 -----EWKVGDLVLAQVKG--FPAWPAVVD
NP_850485_At_HDGFr_At2g48160 -----GDLVLAQVKG--FPAWPAVVS
XP_002880345_Alyrata         -----KWKVGDLVLAQVKG--FPAWPAVVS
XP_002876705_Alyrata         -----KVGDLVLAQVKG--FPAWPAVVS
XP_002465241_Sorghum        -----WKVGDLVLAQVKG--FPAWPAVVS
XP_002463300_Sorghum        -----QWKVGDLVLAQVKG--FPAWPAVVS
XP_002974023_Selaginella     -----QWKIGDLVLAQVKG--FPAWPAVVS
XP_002983468_Selaginella     -----QWKIGDLVLAQVKG--FPAWPAVVS
XP_002962776_Selaginella     -----EWSVGDVLAQVKG--FPAWPAVVS
NP_197706_HUA2_At_HDGFr_AT5G23 -----QLVLGDLVLAQVKG--FPAWPAKIS
XP_002872040_Alyrata         -----GQLILGDLVLAQVKG--FPAWPAKIS
NP_196440_At_AT5G08230       -----GEMRLGDLVLAQVKG--FPAWPAKIG
XP_002873347_Alyrata         -----LRLGDLVLAQVKG--FPAWPAKIG

```

XP\_002310078\_Populus -----QLRLGDLVLAKVKG--YPSWPAKIS  
XP\_002306384\_Populus -----QLRLGDLVLAKVKG--YPSWPAKIS  
XP\_002443678\_Sorghum -----REFQLGDLVLAKIKG--YPPWPAKIS  
XP\_001753837\_Physcomitrella -----REFNEGDLVLAKVKG--WPAWPAQAE  
XP\_001765392\_Physcomitrella -----REFNVGDLVLAKVKG--WPAWPAQ--  
XP\_002878409\_Alyrata -----FTVGDLVWAKCGKR-FPAWPAVVI  
XP\_002878396\_Alyrata -----PWPAMVV  
NP\_191733\_ATX3\_WHCS1r\_AT3G6174 -----FTVGDLVWAKCGKR-FPAWPAVVI  
XP\_002302629\_Populus -----FALGDIVWAKCGKR-YPWWPAIVI  
NP\_194520\_ATX4\_WHCS1r\_AT4G2791 -----FYSGDLVWAKSGRN-EPFWPAIVI  
XP\_002869532\_Alyrata -----FYSGDLVWAKSGRN-EPFWPAIVI  
NP\_200155\_ATX5\_At\_AT5G53430 -----FYSGDLVWAKSGRN-EPFWPAIVI  
XP\_002864242\_Alyrata -----FYSGDLVWAKSGRN-EPFWPAIVI  
XP\_002318412\_Populus -----FYSGDLVWAKSGMK-YPFWPAIVI  
XP\_002321418\_Populus -----FYSGDIVWAKSGNK-YPFWPAIVI  
XP\_002454931\_Sorghum -----FVLGDVWARSQK-SPTWPALVI  
XP\_002961390\_Selaginella -----FDIGDIVWAKSGKKDPVWPAKV  
XP\_002980880\_Selaginella -----FDIGDIVWAKSGKKDPVWPAKV  
XP\_001777592\_Physcomitrella -----FDLGEIVWAKSGKRNDPVWPARVI  
XP\_002456070\_Sorghum -----LVYGDIVWAKLGKR-QPMWPGVLI

NP\_850170\_ATX1\_At2g31650 DESIIGERKGLNKNVSGGSLLVQFFGTH-DFARI-----  
XP\_002881186\_Alyrata DESVIGERKGLNKNVSGGSLLVQFFGTH-DFARI-----  
NP\_172074\_ATX2\_AT1G05830 DESVIVKRKGLNKNISGGRSVLVQFFGTH-DFARI-----  
XP\_002301643\_Populus DGALIGDHKGISKNI-GGGSISVQFFGTH-DFARI-----  
XP\_002320433\_Populus DEALIGNHKGISKNI-GGRSVSVQFFGTH-DFARI-----  
XP\_002889570\_Alyrata DESVIVKRKGLNKNKASGGRSVLVQFFGTH-DFARI-----  
XP\_002459927\_Sorghum DESNVPATRAL-KSIRLDQSIILVQFFGTH-DFARE-----  
XP\_002992195\_Selaginella DEE-HAEKCGLERPLKKST-FAVQFFGSC-DFARL-----  
XP\_002982095\_Selaginella DEE-HAEKCGLERPLKKST-FAVQFFGSC-DFARL-----  
XP\_001767466\_Physcomitrella DED-HAAACGME-PGKKGM-VPLQFFGSY-DHCRF-----  
XP\_001780587\_Physcomitrella DED-HAAACGMD-PGKKGM-VPLQFFGSY-DHCRF-----  
XP\_002975241\_Selaginella DDQ-HARLCNLE--ISTGE-LPVHYFGTY-ESA-----  
XP\_001760849\_Physcomitrella NERAFQPGTGGN--RRSNTDVLVRFVFGTY-DYG-----  
XP\_001751216\_Physcomitrella NEKAVIPGTGGN--KRINADVLSKCF-IY-GLGSDGKCSG  
XP\_002961091\_Selaginella DEKMSERT-----RQSKNHVLRVRFVFGNY-NYG-----  
XP\_002966918\_Selaginella DEKMSERT-----RQSKNHVLRVRFVFGNY-NYG-----  
XP\_002444527\_Sorghum DELCVGSKP--K--KKDKYDCLVRLYGTC-QYL-----  
NP\_189424\_At\_AT3G27860 DSL--DASDLALKTMQK-GKLLVAYFGDG-SFFG-----  
XP\_002875407\_Alyrata DSL--DASDLALKTMQK-GKLLVAYFGDG-KFC-----  
NP\_198850\_At\_AT5G40340 DPS--DASDLALKIKQK-GKLLVACFGDG-TFA-----  
XP\_002305994\_Populus DPS--NASDYAKKVKQR-DKILVAYFGDS-TFA-----  
NP\_195915\_At\_AT5G02950 DKS--VASKAAMRHFKK-GNVLVAYFGDC-TFA-----  
XP\_002871003\_Alyrata DAS--VASKAAKKHFKKGNLLVAYFGDC-TFA-----  
NP\_187578\_At\_At3g09670 DAS--AATDKAKKHFKK-GSFLVTYFGDC-TFA-----  
XP\_002882633\_Alyrata DAS--AATDKAKKHFKK-GSFLVTYFGDC-TFA-----  
XP\_002326168\_Populus GRS--DASKKAKKHFKK-NSYLIAYFGDQ-TFA-----  
XP\_002322856\_Populus GCA--DASKKAKKHFKK-DSYLIAYLGDQ-TFA-----  
XP\_002315275\_Populus DPS--DASEKAMRYHKK-DCYLVAIFGDR-TFA-----  
XP\_002439929\_Sorghum DPS--DASELALKHQK-GSHLVAYFGDN-TFA-----  
XP\_002440507\_Sorghum DAA--DASADARALRRPRGAVLVAYFWDK-TFA-----  
XP\_002318650\_Populus DPL--GVTKYAVQSDQR-NGLLVGYLGSC-HIA-----  
XP\_002461281\_Sorghum SAG--GNGTGHE-----GQFLVSYFGDK-AFA-----  
NP\_187194\_At\_AT3G05430 NEA--FAS-PSVRRVKKMGYVLVAFFGDN-SYG-----  
XP\_002882413\_Alyrata NEA--FAS-PSVRRMKKMGYVLVAFFGDN-SYG-----  
XP\_002319529\_Populus NEA--FAS-SSVRRTRREGHVLVAFFGDS-SYG-----

XP\_002330150\_Populus  
NP\_198117\_At\_AT5G27650  
XP\_002330341\_Populus  
XP\_002439285\_Sorghum  
NP\_191866\_At\_HDGFr\_AT3G63070  
NP\_850485\_At\_HDGFr\_At2g48160  
XP\_002880345\_Alyrata  
XP\_002876705\_Alyrata  
XP\_002465241\_Sorghum  
XP\_002463300\_Sorghum  
XP\_002974023\_Selaginella  
XP\_002983468\_Selaginella  
XP\_002962776\_Selaginella  
NP\_197706\_HUA2\_At\_HDGFr\_AT5G23  
XP\_002872040\_Alyrata  
NP\_196440\_At\_AT5G08230  
XP\_002873347\_Alyrata  
XP\_002310078\_Populus  
XP\_002306384\_Populus  
XP\_002443678\_Sorghum  
XP\_001753837\_Physcomitrella  
XP\_001765392\_Physcomitrella  
XP\_002878409\_Alyrata  
XP\_002878396\_Alyrata  
NP\_191733\_ATX3\_WHCS1r\_AT3G6174  
XP\_002302629\_Populus  
NP\_194520\_ATX4\_WHCS1r\_AT4G2791  
XP\_002869532\_Alyrata  
NP\_200155\_ATX5\_At\_AT5G53430  
XP\_002864242\_Alyrata  
XP\_002318412\_Populus  
XP\_002321418\_Populus  
XP\_002454931\_Sorghum  
XP\_002961390\_Selaginella  
XP\_002980880\_Selaginella  
XP\_001777592\_Physcomitrella  
XP\_002456070\_Sorghum

NEA--FAS-SSVRRTRREGHVLVAFFGDS--SYG-----  
NEA--FAS-PSVRRMRRIDHVLVAFFGDS--SYG-----  
-----REGHVLVAFFGDG--SYG-----  
SVN--LTDDEEVHRGYRDGLVLVAFFGDS--SYG-----  
-----EPEKWGHSADSKKVTVHFFGT--QQIA-----  
-----EPEKWDASPDSKKVVFVHFFGT--QQIA-----  
-----EPEKWGALTDLKKVVFVHFFGT--QQIA-----  
-----QPEKWGYSADSKKVLVHFFGT--QQIA-----  
-----EPEQWKMPSTKKKPLVYFYGT--KQIA-----  
-----FIKYSVHINIYRS--QDIV-----  
-----RAEDFGRQRNPAKVVFVFFGT--KQIR-----  
-----RAEDFGRQRNPAKVVFVFFGT--KQIR-----  
-----KPEAFGQHHNPARVVFVFFGT--KQIR-----  
-----RPEDWDRAPDPKKYFVQFFGT--EEIA-----  
-----RPEDWDRAPDPKKYFVQFFGT--EEIA-----  
-----QPEDWNQAPDPKKHFVQFFGT--GEIG-----  
-----QPEDWNQAPDPKKHFVQFFGT--QEIG-----  
-----RPEDWKRVAADAKKVFVYFFGT--QEIA-----  
-----RPEDWKRAPDAKKVFVYFFGT--QEIA-----  
-----RPEDWQHKTTPKKFFVYFYGT--EEIA-----  
VSCFPQEIGKLETQGKHAGKYVVTYFGPG--QQIG-----  
-----IGRLETQGKHAGKYVVTYFGPG--QQIG-----  
DPISQAPDGVLL--KHCVPGAICVMFFGYS--KDG--TQRDYA  
DPISQAPDGVLL--KHCVPGAICVMFFGYS--KNG--TQRDYA  
DPISQAPDGVLL--KHCVPGAICVMFFGYS--KDG--TQRDYA  
DPILQAPDAVL--SCCVPGAICIMFYGYS--KNG--TQRDYA  
DPMTQAPDELVL--RSCIPDAACVVFVFGHS--GNE--NERDYA  
DPMTQAPDELVL--RSCIPDAACVVFVFGHS--GNE--NERDYA  
DPMTQAPDELVL--RSCIPDAACVMFFGHS--GTE--NERDYA  
DPMTQAPDELVL--RSCIPDAACVMFFGHS--GTE--NERDYA  
DPMTQAPDELVL--RSCIPDAACVMFFGHS--GTE--NERDYA  
DPMTQAPDELVL--RSCIPDAACVMFFGCS--GNDGDQRDYA  
DPMTQAPDELVL--RSCIPDAACVMFFGCS--GNDGNQRDYA  
DPMQHAPDEVVL--NSCVPGALCVMFFGYS--ANG--HGRDYG  
DPIKEVPESVR--RKCVPNRLCVMFYGESLARGVKRRDYA  
DPIKEVPESVR--RKCVPNRLCVMFYGESLARGVKRRDYA  
DPFREAPPVVR--ELSLPNSLCVMFYGPSSSKGKHSRDYA  
DPTQQVAADAMPQPRRVAVLVCVMLFGWCTEFS--DEKKYV

NP\_850170\_ATX1\_At2g31650  
XP\_002881186\_Alyrata  
NP\_172074\_ATX2\_AT1G05830  
XP\_002301643\_Populus  
XP\_002320433\_Populus  
XP\_002889570\_Alyrata  
XP\_002459927\_Sorghum  
XP\_002992195\_Selaginella  
XP\_002982095\_Selaginella  
XP\_001767466\_Physcomitrella  
XP\_001780587\_Physcomitrella  
XP\_002975241\_Selaginella  
XP\_001760849\_Physcomitrella  
XP\_001751216\_Physcomitrella  
XP\_002961091\_Selaginella  
XP\_002966918\_Selaginella  
XP\_002444527\_Sorghum  
NP\_189424\_At\_AT3G27860

KVKQAISFIK--GLLSPSHLKCKQP-----RFEEG  
KEKQAISFIK--GLLSPSHLKCKQP-----RFEEG  
QVKQAVSFLK--GLLSRSPKCKQP-----RFEEA  
KPKQAISFLK--GLLSSFHLKCKQP-----RFTRS  
LSEQKLP-----  
--EDCHDFEP--RDIWAKLTGHA-----  
-----  
NNDKIVTFSK--GVQLKYHSKCKRP-----AFDQG  
NNDKIVTFSK--GVQLKYHSKCKRP-----AFDQG  
SYKKLVIFSK--GLMMKFHTKCKRV-----VFVQG  
SYKKLVIFSK--GLMMKFHTKCKRV-----VFVQG  
-----  
WVDPEVGLSEFDVKMQERSRIKKK-----AFQKG  
WVDPKVGLSEFDVKLQERSKIKKK-----ALQKG  
WVDPASDLKSFVDVDFDGRSQVPTK-----AFQKG  
WVDPASDLKSFVDVDFDGRSQVPTK-----AFQKG  
YVDPWKSNSEFEMMLKQENKSTME-----AFREV  
WCNPLE--LKPFLNFKEFSKMSDS-----RRFLLA

XP\_002875407\_Alyrata WCNPLE-LKPFLENFKEFSKMSSES-----KRFLSA  
NP\_198850\_At\_AT5G40340 WCGASQ-LKPFSAESFKECSKVSNS-----RSFLGA  
XP\_002305994\_Populus WCNPSQ-LSPFEENFVEMFKQSNS-----KSFVNA  
NP\_195915\_At\_AT5G02950 WNNASQ-IKPFHQNFSSQMFEQSNS-----AEFRDA  
XP\_002871003\_Alyrata WNNASQ-VKPFHQNFSSQMFEQSNL-----AEFRDA  
NP\_187578\_At\_At3g09670 WNEASR-IKPFHQHFSQMAKQSSL-----PDFIDA  
XP\_002882633\_Alyrata WNDASR-VKPFHQHFSQMAKQSSL-----PDFIDA  
XP\_002326168\_Populus WNEVSK-IKPFRCNFSLLEKQSNL-----EDFHDA  
XP\_002322856\_Populus WNEVSK-IKPFRCNFSLLEKQSNL-----EDFHDA  
XP\_002315275\_Populus WNEASL-LKPFRRSHFSQVEKQSNL-----EVFQNA  
XP\_002439929\_Sorghum WCDESQ-LKPFVITNYSQMEKQSTS-----DAFVGS  
XP\_002440507\_Sorghum WNDAAA-LLPFRAF-----  
XP\_002318650\_Populus WCLPSQ-LKPFHKDFEQMVVKNKA-----RSFLGA  
XP\_002461281\_Sorghum WCDGAE-LRPYEPYFPVAELYDDGG-----EDFDAA  
NP\_187194\_At\_AT3G05430 WFDPAE-LIPFEPHVKEKSQQ-TSS-----DHFAKA  
XP\_002882413\_Alyrata WFDPAE-LLPFEPHVAENSQQ-TSS-----GHFAKA  
XP\_002319529\_Populus WFDPAE-LIQFDVNFAEKSQQ-TNS-----RTFIKA  
XP\_002330150\_Populus WFDPAE-LIPFDANFAEKSQQ-TNS-----RTFIRA  
NP\_198117\_At\_AT5G27650 WFDPAE-LIPFEPNLEEKSSQQQTVS-----KHVRA  
XP\_002330341\_Populus WLDPTE-LVQFDSHYVEKSKQTNAK-----VFLIKA  
XP\_002439285\_Sorghum WFEPSE-LVPFEDHFTEK-----  
NP\_191866\_At\_HDGFr\_AT3G63070 FCNHGD-VESFTEEEKQSLLTRRH-----AKGS--DFVRA  
NP\_850485\_At\_HDGFr\_At2g48160 FCNPGD-VEAFTEERKQSLLTRRH-----AKGS--DFVRA  
XP\_002880345\_Alyrata FCNHTD-VEAFTEERKQSLLTKRH-----AKGS--DFLRA  
XP\_002876705\_Alyrata LCNPAD-VESFTEEEKQLLLTKRH-----AKGS--DFVRA  
XP\_002465241\_Sorghum FCNYAD-LEAFTEEEKRSLAKRH-----GKGA--DFLRA  
XP\_002463300\_Sorghum EITEPE-QWDLPAAKKKSIVAKK-----KLL--VYFYG  
XP\_002974023\_Selaginella FCQHSE-ISAFTEARAALHARTL-----SKCVPSDLKRA  
XP\_002983468\_Selaginella FCQHSE-ISAFTEARAALHARTL-----SKCVPSDLKRA  
XP\_002962776\_Selaginella FCHHSE-ISKFTPEAKASLVAKAH-----SKCTPADLRLA  
NP\_197706\_HUA2\_At\_HDGFr\_AT5G23 FVAPPD-IQAFTSEAKSKLLARC-----QGKTV-KYFAQA  
XP\_002872040\_Alyrata FVAPPD-IQAFTSEAKSKLLARC-----QGKTV-KYFAQA  
NP\_196440\_At\_AT5G08230 FVTTPD-IQPFTSETKKKLSARC-----QGKTV-KYFSQA  
XP\_002873347\_Alyrata FVAPPD-IQPFTSEAKNKLLARC-----QGKTV-KYFSQA  
XP\_002310078\_Populus FVAPSD-IQVFTNEVKNKLSARC-----QSKKD-RFFSQA  
XP\_002306384\_Populus FVAPSD-IQVFTNEVKNKLSARC-----QSKKD-KFFSQA  
XP\_002443678\_Sorghum FVPLAD-LEEFTEKTKNDLLDRAPNIKVQRKYV-QVFNDA  
XP\_001753837\_Physcomitrella WCLPVE-LSEFDADQREASIQKSL-----KKTADKKFISA  
XP\_001765392\_Physcomitrella WCLPVE-LSEFDADQREASVQKSL-----KKTADKKFIFA  
XP\_002878409\_Alyrata WVRQGM-MYPFTEFMDKFQDQTNLYN-----YKPSEFKKA  
XP\_002878396\_Alyrata WVRQGM-VYPFTEFMDKFQDQTNLYN-----YKPSEFKKA  
NP\_191733\_ATX3\_WHCS1r\_AT3G6174 WVRQGM-VYPFTEFMDKFQDQTNLFN-----YKASEFNKA  
XP\_002302629\_Populus WVKQGM-VFPFAEFMERFQVQSQMFK-----CKLSDFQVA  
NP\_194520\_ATX4\_WHCS1r\_AT4G2791 WVRRGM-IFPFVDYVARFQEQLQ-----CKPGNFQMA  
XP\_002869532\_Alyrata WVRRGM-IFPFVDYVARFQEQLQ-----CKPGNFQMA  
NP\_200155\_ATX5\_At\_AT5G53430 WVRRGM-IFPFVDYVERLQEQLQ-----CNPRDFQMA  
XP\_002864242\_Alyrata WVRRGM-IFPFVDYVDRFQEQLQ-----CNPREFQMA  
XP\_002318412\_Populus WVQRGM-IFPFVDFVDRFQEQLQ-----CKPGDFQMA  
XP\_002321418\_Populus WVQRGM-IFPFVDFVDRFQEQLQ-----FN-GDFQMA  
XP\_002454931\_Sorghum WVKQGM-IFPFVDYLDRFQGGP-LYK-----LRPSKFRAA  
XP\_002961390\_Selaginella WVRKGM-IFPFVDYLERFQSQTSEFNK-----SQPGDFWSA  
XP\_002980880\_Selaginella WVRKGM-IFPFVDYLERFQSQTSEFNK-----SQPGDFWSA  
XP\_001777592\_Physcomitrella WVKQGM-IFPFNAYLERFQSQTQLNR-----SRPVDFRQA  
XP\_002456070\_Sorghum WVRQGL-IFPFSDYMDRFQGGTELSS-----CKPADFRRA

NP\_850170\_ATX1\_At2g31650

MQEA-----

|                                |             |
|--------------------------------|-------------|
| XP_002881186_Alyrata           | MQEA-----   |
| NP_172074_ATX2_AT1G05830       | MEEA-----   |
| XP_002301643_Populus           | LEEA-----   |
| XP_002320433_Populus           | -----       |
| XP_002889570_Alyrata           | -----       |
| XP_002459927_Sorghum           | -----       |
| XP_002992195_Selaginella       | LRE-----    |
| XP_002982095_Selaginella       | LRE-----    |
| XP_001767466_Physcomitrella    | LEEVE-----  |
| XP_001780587_Physcomitrella    | LEEVE-----  |
| XP_002975241_Selaginella       | -----       |
| XP_001760849_Physcomitrella    | IEEALEY---- |
| XP_001751216_Physcomitrella    | IEEALEF---- |
| XP_002961091_Selaginella       | LKEALEY---- |
| XP_002966918_Selaginella       | LKEALEY---- |
| XP_002444527_Sorghum           | LEK-----    |
| NP_189424_At_AT3G27860         | VEDA-----   |
| XP_002875407_Alyrata           | VEEA-----   |
| NP_198850_At_AT5G40340         | VEEAVEE---- |
| XP_002305994_Populus           | VKEAVDE---- |
| NP_195915_At_AT5G02950         | IDCALDE---- |
| XP_002871003_Alyrata           | IDCALDE---- |
| NP_187578_At_At3g09670         | IDFALEE---- |
| XP_002882633_Alyrata           | IDFALEE---- |
| XP_002326168_Populus           | VHCALDE---- |
| XP_002322856_Populus           | VHCALDE---- |
| XP_002315275_Populus           | VDCSLEE---- |
| XP_002439929_Sorghum           | VNNALEE---- |
| XP_002440507_Sorghum           | -----       |
| XP_002318650_Populus           | VEKAVDE---- |
| XP_002461281_Sorghum           | VEASLDE---- |
| NP_187194_At_AT3G05430         | VEEAMNE---- |
| XP_002882413_Alyrata           | VEEAMDE---- |
| XP_002319529_Populus           | VEEATDE---- |
| XP_002330150_Populus           | VEEATDE---- |
| NP_198117_At_AT5G27650         | VEEAKDE---- |
| XP_002330341_Populus           | VEEADD----- |
| XP_002439285_Sorghum           | -----       |
| NP_191866_At_HDGFr_AT3G63070   | VKEITES---- |
| NP_850485_At_HDGFr_At2g48160   | VKEIIES---- |
| XP_002880345_Alyrata           | VKEIIES---- |
| XP_002876705_Alyrata           | VKEITES---- |
| XP_002465241_Sorghum           | VDEIVE----- |
| XP_002463300_Sorghum           | TKE-----    |
| XP_002974023_Selaginella       | VKEICE----- |
| XP_002983468_Selaginella       | VKEICE----- |
| XP_002962776_Selaginella       | VSEIC-----  |
| NP_197706_HUA2_At_HDGFr_AT5G23 | VEQICTA---- |
| XP_002872040_Alyrata           | VEQICTA---- |
| NP_196440_At_AT5G08230         | VEEI-----   |
| XP_002873347_Alyrata           | VEEI-----   |
| XP_002310078_Populus           | VKEICAA---- |
| XP_002306384_Populus           | VKEICAA---- |
| XP_002443678_Sorghum           | VEQICKA---- |
| XP_001753837_Physcomitrella    | VKEIC-----  |
| XP_001765392_Physcomitrella    | VKEIC-----  |
| XP_002878409_Alyrata           | LEEAVLAENG- |

|                                |              |
|--------------------------------|--------------|
| XP_002878396_Alyrata           | LDEAVLAENG-  |
| NP_191733_ATX3_WHCS1r_AT3G6174 | LEEAVLAENGN  |
| XP_002302629_Populus           | LEEAILAESGF  |
| NP_194520_ATX4_WHCS1r_AT4G2791 | LEEAFLLADQGF |
| XP_002869532_Alyrata           | LEEAFLLADQGF |
| NP_200155_ATX5_At_AT5G53430    | LEEALLADQGF  |
| XP_002864242_Alyrata           | LEEALLADQGF  |
| XP_002318412_Populus           | VEEAFLLAEQGF |
| XP_002321418_Populus           | FEEAFLLAEQGF |
| XP_002454931_Sorghum           | IEEAFLLAERGF |
| XP_002961390_Selaginella       | IEEATLLAEAG- |
| XP_002980880_Selaginella       | IEEATLLAEAG- |
| XP_001777592_Physcomitrella    | ISEAKLAD---  |
| XP_002456070_Sorghum           | VEEAFLLADQGF |



Multiple sequence alignment of animal PWWP-domain containing sequences. The multiple sequence alignment was used to reconstruct the neighbor joining (Fig. 6) phylogeny.

```

3068_HDGF_NP_004485          -----KEYKCGDLVFAKMKGYPHWPARIDE---MPEAAVKS
50810_HDGFRP3_CCDS32314     -----REYKAGDLVFAKMKGYPHWPARIDE---LPEGAVKP
84717_HDGFRP2_UNQ785PRO1604 -----HAFKPGDLVFAKMKGYPHWPARIDD---IADGAVKP
154150_HDGFL1_NP_612641     -----YKSGDLVFAKLGKGYAHWPARIEH---MTQ-----
XP_001634069_Nv            -----MTYQPGDLIWAQMRGYPHWPARIDL---AAKDEVIP
84656_GLYR1_NM_032569       -----LRLGDLVWGKLGKRYPPWPGKIVN---PPKDLKKP
7468_a_WHSC1_NM_133330_WHSCr -----LHFQDIWVKLGNRWPAEIVCHPKNVPPNIQKM
64324_a_NSD1_NM_172349_WHSCr -----PHYREIVWVKVGRYRWPAEICHPRAVPSNIDKM
54904_a_WHSC1L1_NM_023034_WHSC -----LHYKQIVWVKLGNRWPAEICNPRSVPLNIQGL
XP_001635219_Nv            -----LLYGDIVWVKLGMWRWPAICNPRDVPPTNIQSM
114825_PWWP2Aisob_NP_001124336 -----ICVGDIVWAKIYGFPPWPARILT--ITVSRKDNG
170394_PWWP2B_NM_138499     -----VAVGDIVWVKIYGFPPWPARVLD--ISLGQKEDG
XP_001624451_Nv            -----INEGSIWVKVGHGPPWPGRVMA--ITEVVDQDQ
1788_DNMT3A_NM_022552       -----FGIGELVWVKLGRGFSWVPGRIVS--WMMTGRSRA
1789_DNMT3B_NM_006892       -----FGIGDLVWVKLGRGFSWVPAMVVS--WKATSKRQA
XP_001626231_Nv            -----GVLVWVKLGRGFSWVPGRVVT--YMEAGRPPP
54904_b_WHSC1L1_NM_023034_MSH6 -----KFQVGDVWVKVGTYPWVPCMVSSDPQLEVHTKIN
7468_b_WHSC1_NM_133330_MSH6L -----LKYNVGDVWVKVSGYPWVPCMVVSADPLLSYTKLK
64324_b_NSD1_NM_172349_MSH6L -----LKYEVGDVWVKVSGYPWVPCMVVSADPLINTHSKMK
152098_ZCWPW2_NP_001035522 -----PLGSLVWVKLQNWPSWPGIILCPDRFKGKYVITYD
XP_001633052_Nv            -----SPFPTGAIWVWAKLAGYPWVPCMVVSADPLINTHSKMK
10771_ZMYND11_NM_006624     WFCYPCIPNHELWVWAKMKGFGFWPAKVMQ----KEDNQVD
XP_001625954_Nv            WFCKPCFFPHELWVWAKMTGEPWPAKLLT----WSDDQTR
23613_ZMYND8_NM_183047     WFCEPCSNPHPLVWAKLKGFPWPAKALR----DKDGQVD
NP_116242                   -----FEVGMVLVWVHKHKYPFWPAVVKSVRQRDK-----
139221_MUM1L1_NM_152423     -----FETGMIVWFKYQKYPFWPAVVKSVRQRDK-----
728317_LOC728317_XP_001127165 -----IERGTMVWFKFQDHPFPAVVKSVSNTDK-----
728307_LOC728307_XP_001127139 -----IERGTMVWFKFQDHPFPAVVKSVSNTDK-----
27154_BRPF3_NM_015695       -----LEPLELVWAKCRGYPSYPALIIDPKMPREGLLHN
7862_BRPF1_NM_001003694     -----LDALDLVWAKCRGYPSYPALIIDPKMPREGMFHH
23774_BRD1_NM_014577        -----LEPLKVVWAKCSGYPSYPALIIDPKMPRVPGHHN
55063_ZCWPW1_NM_017984     ----ASYIPGSIWAKQYGYPPWPGMIESDPDLGEYFLFT
2956_MSH6_HSU54777         ----CDFSPGDLVWAKMEGYPWWPCLVYNHPFDGTFIREK

```

:: \* :\*

```

3068_HDGF_NP_004485          T-----ANKYQVFFFVGT-HETAFLGPKDLFPY-EESKEKEF
50810_HDGFRP3_CCDS32314     P-----ANKYPIFFFVGT-HETAFLGPKDLFPY-KEYKDKF
84717_HDGFRP2_UNQ785PRO1604 P-----PNKYPIFFFVGT-HETAFLGPKDLFPY-DKCKDKY
154150_HDGFL1_NP_612641     -----PNRYQVFFFVGT-HETAFLSPKRLFPY-KECKEKEF
XP_001634069_Nv            -----AKKYPIFFVGT-HETAVMPLPKDLFPY-EKHKHKF
84656_GLYR1_NM_032569       R---G-KKCFVVKFFVGT-EDHAWIKVEQLKPY-HAHKEEM
7468_a_WHSC1_NM_133330_WHSCr K---HEIGEFVFFFVGS-KDYWVTHQARVFPYMEGDRGSR
64324_a_NSD1_NM_172349_WHSCr R---HDVGEFPVFFFVGS-NDYLWVTHQARVFPYMEGDVSSK
54904_a_WHSC1L1_NM_023034_WHSC K---HDLGDFPFFFVGS-HDYVWVHQRVFPYVEGDGK-SF
XP_001635219_Nv            R---HQPGFVPMVFLGS-HDFYWIHKGRVFSYQDGDGKTE
114825_PWWP2Aisob_NP_001124336 L---LVRQEARISWFGS-PTTSFLALSQLSPFLENFQSRF
170394_PWWP2B_NM_138499     E---PSWREAKVSWFGS-PTTSFLSISKLSPFSEFFKLRF
XP_001624451_Nv            G----VDTFAHVTWFGS-NTSSEMPVQELQDFEPNFRRRY
1788_DNMT3A_NM_022552       A-----EGTRWVMWFGD-GKFSVVCVEKLMPLSS-FCSAF
1789_DNMT3B_NM_006892       M-----SGMRWVQWFGD-GKFSVVSADKLVALGL-FSQHF
XP_001626231_Nv            G-----PGNHVWVWFGD-NKFSQVYDVTLPFAE-FKSNF
54904_b_WHSC1L1_NM_023034_MSH6 ---TRGAREYHVQFFSNQPERAWVHEKRVREYKGHKQYEE

```

7468\_b\_WHSC1\_NM\_133330\_MSH61  
64324\_b\_NSD1\_NM\_172349\_MSH61  
152098\_ZCWPW2\_NP\_001035522  
XP\_001633052\_Nv  
10771\_ZMYND11\_NM\_006624  
XP\_001625954\_Nv  
23613\_ZMYND8\_NM\_183047  
NP\_116242  
139221\_MUM1L1\_NM\_152423  
728317\_LOC728317\_XP\_001127165  
728307\_LOC728307\_XP\_001127139  
27154\_BRPF3\_NM\_015695  
7862\_BRPF1\_NM\_001003694  
23774\_BRD1\_NM\_014577  
55063\_ZCWPW1\_NM\_017984  
2956\_MSH6\_HSU54777

G-QKKSARQYHVQFFGDAPERAWIFEKSLVAFEGEGQFEK  
VSNRRPYRQYVVEAFGDPSERAWVAGKAIVMFEGRHQFEE  
P-DGNV-EEYHIEFLGDPHSRSWIKATFVGHYSITLKPEK  
L-DDRIPISYHVVFVGKDVSRRAWNSFSVRELTADEEPEP  
-----VRFFGHHHQRAWIPSENIQDITVNIHRLH  
A-----LVREFFGSAHQ-----  
-----ARFFG-QHDRAWVPINNCYLMSKEIPFSV  
-----KASVLYIEGHMNPCKMG---FTVSLKSLKHFD  
-----KASVLFVEANMNSEKKG---IRVNFRLKKFD  
-----TARVLLLEANLHHGKRG---IQVPLRRLKHL  
-----TARVLLLEANLHHGKRG---IQVPLRRLKHL  
G-VPIPVPPPLDVLKLGQKQAEAGEKLFVLVFFDNKRTWQ  
G-VPIPVPPLEVLKLGQMTQEAREHLYLVLFFDNKRTWQ  
G-VTIPAPPLDVLKIGEHMQTKSDEKLFVLVFFDNKRSWQ  
SHLDSLPSKYHVTFFGETVSRAWIPVNMMLKNFQELSLELS  
G----KSVRVHVQFFDDSPTRGWVSKRLLKPYTGSKSKEA

3068\_HDGF\_NP\_004485  
50810\_HDGFRP3\_CCDS32314  
84717\_HDGFRP2\_UNQ785PRO1604  
154150\_HDGFL1\_NP\_612641  
XP\_001634069\_Nv  
84656\_GLYR1\_NM\_032569  
7468\_a\_WHSC1\_NM\_133330\_WHSCr  
64324\_a\_NSD1\_NM\_172349\_WHSCr  
54904\_a\_WHSC1L1\_NM\_023034\_WHSC  
XP\_001635219\_Nv  
114825\_PWWP2Aisob\_NP\_001124336  
170394\_PWWP2B\_NM\_138499  
XP\_001624451\_Nv  
1788\_DNMT3A\_NM\_022552  
1789\_DNMT3B\_NM\_006892  
XP\_001626231\_Nv  
54904\_b\_WHSC1L1\_NM\_023034\_MSH6  
7468\_b\_WHSC1\_NM\_133330\_MSH61  
64324\_b\_NSD1\_NM\_172349\_MSH61  
152098\_ZCWPW2\_NP\_001035522  
XP\_001633052\_Nv  
10771\_ZMYND11\_NM\_006624  
XP\_001625954\_Nv  
23613\_ZMYND8\_NM\_183047  
NP\_116242  
139221\_MUM1L1\_NM\_152423  
728317\_LOC728317\_XP\_001127165  
728307\_LOC728307\_XP\_001127139  
27154\_BRPF3\_NM\_015695  
7862\_BRPF1\_NM\_001003694  
23774\_BRD1\_NM\_014577  
55063\_ZCWPW1\_NM\_017984  
2956\_MSH6\_HSU54777

GKPN-----K--RKGFSGLWEIENN-----  
GKSN-----K--RKGFNGLWEIENN-----  
GKPN-----K--RKGFNGLWEIQNN-----  
GKPN-----K--RRGFSAGLWEIENN-----  
AKPC-----K--RKGFMEEALEEIVKN-----  
IKIN-----K--GKRFQQAQVDAVEEFL-----  
YQGV-----RGIGRVFKNALQEAARFREI----  
DKMG-----KGVDTYKKAQEAARFEEL-----  
AEGQ-----TSINKTFKKALEEAARFQEL----  
SGNN-----KYLAKVFKKALVEAEKYDEW----  
NK-----KRGKLYRKAITEAAKAA-----  
NR-----KKGMYRKAITEAANAA-----  
KK-----DKKGCYRRAVRQAQETL-----  
HQAT-----YNKQPMYRKAIYEVLQVA-----  
NLAT-----FNKLVSYRKAMYHALEKA-----  
LVTK-----MKG--LYKKAVLDALEVL-----  
LLAE-----ATKQASNHSEKQKIRKPRPQREARQ  
LCQE-----SAKQAPTKAEEKIKLLKPISGKLRAQ  
LP-----VLRRRGKQKEK-GYRHKVPQKILSK  
CKN-----KKKWYKSALQEA-----  
IGNI-----VVRKKNYKQLDDANGQARQALSPL  
VKR-----SMGWKKACDELELH-----  
-----  
KKT-----KSIFNSAMQEMEVEY-----  
CK-----EKQTLNQAQREDFNQDIGWC----  
CK-----EKQMLVDKAREDYSESIDWC----  
CK-----EKEKLLKRAQKAYKQSVNWC----  
CK-----EKEKLLKRAQKAYKQSVNWC----  
WLPRDKVLPLGVEDTVDKLKMLEGRKTSIRKSVQVAYDRA  
WLPRTKLVPLGVNQDLDEKMLEGRKSNIRKSVQIAYHRA  
WLPKSKMVPLGIDETIDKLMMEGRNSSIRKAVRIAFDRA  
VMKK-----RRNDCSQKLGVALMMAQEAQIS  
QKGG-----HFYSAPPEILRAMQRADEALNKDKIKR

3068\_HDGF\_NP\_004485  
50810\_HDGFRP3\_CCDS32314  
84717\_HDGFRP2\_UNQ785PRO1604  
154150\_HDGFL1\_NP\_612641

-----  
-----  
-----  
-----

|                                |                  |
|--------------------------------|------------------|
| XP_001634069_Nv                | -----            |
| 84656_GLYR1_NM_032569          | -----            |
| 7468_a_WHSC1_NM_133330_WHSCr   | -----            |
| 64324_a_NSD1_NM_172349_WHSCr   | -----            |
| 54904_a_WHSC1L1_NM_023034_WHSC | -----            |
| XP_001635219_Nv                | -----            |
| 114825_PWWP2Aisob_NP_001124336 | -----            |
| 170394_PWWP2B_NM_138499        | -----            |
| XP_001624451_Nv                | -----            |
| 1788_DNMT3A_NM_022552          | -----            |
| 1789_DNMT3B_NM_006892          | -----            |
| XP_001626231_Nv                | -----            |
| 54904_b_WHSC1L1_NM_023034_MSH6 | WDIGIAHAEKALKMTR |
| 7468_b_WHSC1_NM_133330_MSH6l   | WEMGIVQAEAAASMSV |
| 64324_b_NSD1_NM_172349_MSH6l   | WEASVGLAE-----   |
| 152098_ZCWPW2_NP_001035522     | -----            |
| XP_001633052_Nv                | VQERLAV-----     |
| 10771_ZMYND1l_NM_006624        | -----            |
| XP_001625954_Nv                | -----            |
| 23613_ZMYND8_NM_183047         | -----            |
| NP_116242                      | -----            |
| 139221_MUM1L1_NM_152423        | -----            |
| 728317_LOC728317_XP_001127165  | -----            |
| 728307_LOC728307_XP_001127139  | -----            |
| 27154_BRPF3_NM_015695          | MIH-----         |
| 7862_BRPF1_NM_001003694        | LQH-----         |
| 23774_BRD1_NM_014577           | MNH-----         |
| 55063_ZCWPW1_NM_017984         | I-----           |
| 2956_MSH6_HSU54777             | LELAV-----       |

Multiple sequence alignment of *Arabidopsis thaliana* PWWP-domain containing sequences. The multiple sequence alignment was used to reconstruct the maximum likelihood (AF4) and neighbor joining (AF5) phylogenies.

```

NP_850170_ATX1_At2g31650      --FEPGDIVWAKLAG-HAMWPAVIVDESIIGERKGLNNKV
NP_172074_ATX2_AT1G05830     --FEPRDIIWAKLTG-HAMWPAIVDESIVKRRKGLNNKI
NP_195915_At_AT5G02950      -----DLVWAKLRS-YPWWPGLVFD-KSVASKAAMRHFK
NP_187578_At_At3g09670      --ISDSDLVWAKVRS-HPWWPGQVFD-ASAATDKAKKHFK
NP_190402_ATMlike_AT3G48190  -----GNLVVWMTKY-KKWWPGEVVD-FKADAKES-----
NP_187194_At_AT3G05430      --FEVGDMMVWGKVKVS-HPWWPGQIFN-EAFASPSVRRVKK
NP_198117_At_AT5G27650      --FEVGDMLVWGKVKVS-HPWWPGHIFN-EAFASPSVRRMRR
NP_198850_At_AT5G40340      -----GDFVWGKIKN-HPWWPGQIYD-PSDASDLALKIKQ
NP_189424_At_AT3G27860      --FHVGDFVWGEEANSQQWWPGQIYD-SLDASDLALKTMQ
NP_194520_ATX4_WHCS1r_AT4G2791 --FYSGDLVWAKSGRNEPFWPAIVIDPMTQAPELVLRSCI
NP_200155_ATX5_At_AT5G53430  --FYSGDLVWGKSGRNEPFWPAIVIDPMTQAPELVLRSCI
NP_191733_ATX3_WHCS1r_AT3G6174 --FTVGDVWAKCGKRFPAWPAVIDPISQAPDGVLKHCV
NP_191866_At_HDGFr_AT3G63070 -EWKVGDLVLAKVKG-FPAWPAVVEPEKWHGSADSK---
NP_850485_At_HDGFr_At2g48160 -----GDLVLAKVKG-FPAWPAVSEPEKWDASPDSK---
NP_197706_HUA2_At_HDGFr_AT5G23  -QLVLGDLVLAKVKG-FPAWPAKISRPEWDRAPDPK---
NP_196440_At_AT5G08230      -GEMRLGDLVLAKVKG-FPAWPAKIGQPEDWNQAPDPK---

NP_850170_ATX1_At2g31650      SGGGSLLVQFFGTHD-----FARIKVKQAI SFIKGLLS P
NP_172074_ATX2_AT1G05830     SGGRSVLVQFFGTHD-----FARIQVKQAVSFLKGLLSR
NP_195915_At_AT5G02950      KG--NVLVAYFGDCT-----FA-WNNASQIKPFHQNF SQM
NP_187578_At_At3g09670      KG--SFLVTYFGDCT-----FA-WNEASRIKPFHQNF SQM
NP_190402_ATMlike_AT3G48190  -----FMVRSIGQSH-----LVSWFASSKLKPFKESFEQV
NP_187194_At_AT3G05430      MG--YVLVAFFGDN-----SYGWFDPAELIPPEPHVKEK
NP_198117_At_AT5G27650      ID--HVLVAFFGDS-----SYGWFDPAELIPPEPNLEEK
NP_198850_At_AT5G40340      KG--KLLVACFGDG-----TFAWCGASQLKPF AESFKEC
NP_189424_At_AT3G27860      KG--KLLVAYFGDGS-----FFGWCNPLELKPFL ENFKEF
NP_194520_ATX4_WHCS1r_AT4G2791 PD--AACVVFFGHSGNENERDYAWVRRGMIFFPFVDYVARF
NP_200155_ATX5_At_AT5G53430  PD--AACVMFFGHSGTENERDYAWVRRGMIFFPFVDYVERL
NP_191733_ATX3_WHCS1r_AT3G6174 PG--AICVMFFGYSKDGTQRDYAWVRQGMVYPFTEFMDKF
NP_191866_At_HDGFr_AT3G63070 ----KVTVHFFGTQQ-----IAFCNHGDVESFTEEEKQS
NP_850485_At_HDGFr_At2g48160 ----KVFVHFFGTQQ-----IAFCNPGDVEAFTEERKQS
NP_197706_HUA2_At_HDGFr_AT5G23 ----KYFVQFFGTEE-----IAFVAPPDIQAF TSEAKSK
NP_196440_At_AT5G08230      ----KHFVQFYGTGE-----IGFVTPPDIQPF TSETKKK

NP_850170_ATX1_At2g31650      SHLK----CKQPRFEEGMQEA-----
NP_172074_ATX2_AT1G05830     SPLK----CKQPRFEEAMEEA-----
NP_195915_At_AT5G02950      QEQ-----SNSAEFRDAIDCALDE----
NP_187578_At_At3g09670      AKQ-----SSLPDFIDAIDFALEE----
NP_190402_ATMlike_AT3G48190  LNQ-----RNDNGFFDALQKA-----
NP_187194_At_AT3G05430      SQQ-----TSSDHFAKAVEEAMNE----
NP_198117_At_AT5G27650      SQQQ----TVSKHFVRAVEEAKDE----
NP_198850_At_AT5G40340      SKV-----SNSRSFLGAVEEAVEE----
NP_189424_At_AT3G27860      SKM-----SDSRRFLLAVEDA-----
NP_194520_ATX4_WHCS1r_AT4G2791 QEQP ELQGCKPGNFQMALEEAFLADQGF
NP_200155_ATX5_At_AT5G53430  QEQSELRGCNPRDFQMALEEA LLADQGF
NP_191733_ATX3_WHCS1r_AT3G6174 QDQTNL FNYKASEFNKALEEA VLAENGN
NP_191866_At_HDGFr_AT3G63070 LLTR-RHAKGSD-FVRAVKEI TES----
NP_850485_At_HDGFr_At2g48160 LLTR-RHAKGSD-FVRAVKEI IES----
NP_197706_HUA2_At_HDGFr_AT5G23 LLAR-CQGKTVKYFAQAVEQICTA----
NP_196440_At_AT5G08230      LSAR-CQGKTVKYFSQAVEEI-----

```

Multiple sequence alignment of plant and algae PWWP-domain containing sequences. The multiple sequence alignment was used to reconstruct the neighbor joining (AF8) phylogeny.

```

XP_002318650_Populus      -----FHVGDIVVVKTKN---QSWWPGKI
XP_002461281_Sorghum     -----FAPGDMVWGKKLN---HAAWPGLI
NP_189424_At_AT3G27860   -----FHVGDFVWGEEANS--QQWWPGQI
XP_002875407_Alyrata     -----FHVGDFVWGKEVNS--QQWWPGQI
NP_198850_At_AT5G40340   -----GDFVWGKIKN---HPWWPGQI
XP_002305994_Populus     -----FRVGDFVWGKIKS---HPWWPGRV
NP_195915_At_AT5G02950   -----DLVWAKLRS---YPWWPGLV
XP_002871003_Alyrata     -----DLVWAKIRS---YPWWPGQV
NP_187578_At_At3g09670   -----ISDSDLVWAKVRS---HPWWPGQV
XP_002882633_Alyrata     -----ISDSDLVWAKVRS---HPWWPGQV
XP_002326168_Populus     -----LSVGDVWVGKIRS---HPWWPGQV
XP_002322856_Populus     -----GDLVWGKIRS---HPWWPGQI
XP_002315275_Populus     -----FVSVDLVWGVKRS---HPWWPGQI
XP_002439929_Sorghum     -----DLVWGKIVKS---HPWWPGEI
XP_002440507_Sorghum     -----PGRLVWGVKVRD---HPWWPAQV
NP_187194_At_AT3G05430   -----FEVGDMVWGVKRS---HPWWPGQI
XP_002882413_Alyrata     -----FEVGDMVWGVKRS---HPWWPGQI
XP_002319529_Populus     -----FEVGDMVWGVKRS---HPRWPGHI
XP_002330150_Populus     -----FEVGDMVWGVKRS---HPWWPGHI
NP_198117_At_AT5G27650   -----FEVGDVWGVKRS---HPWWPGHI
XP_002330341_Populus     -----
XP_002439285_Sorghum     -----PRFGDMVWAKVKS---HPWWPGHI
XP_002878409_Alyrata     -----FTVGDVWAKCGKR--FPAWPAVV
XP_002878396_Alyrata     -----
NP_191733_ATX3_WHCS1r_AT3G6174 -----FTVGDVWAKCGKR--FPAWPAVV
XP_002302629_Populus     -----FALGDVWAKCGKR--YPWWPAIV
NP_194520_ATX4_WHCS1r_AT4G2791 -----FYSGDLVWAKSGRN--EPFWPAIV
XP_002869532_Alyrata     -----FYSGDLVWAKSGRN--EPFWPAIV
NP_200155_ATX5_At_AT5G53430 -----FYSGDLVWAKSGRN--EPFWPAIV
XP_002864242_Alyrata     -----FYSGDLVWAKSGRK--EPFWPAIV
XP_002318412_Populus     -----FYSGDLVWAKSGMK--YFPWPAIV
XP_002321418_Populus     -----FYSGDVWAKSGNK--SPTWPAIV
XP_002454931_Sorghum     -----FVLGDVWARSGKK--SPTWPAIV
XP_002961390_Selaginella -----FDIGDIVWAKSGKKK--DPVWPAKV
XP_002980880_Selaginella -----FDIGDIVWAKSGKKK--DPVWPAKV
XP_001777592_Physcomitrella -----FDLGEIVWAKSGKRN--DPVWPARV
XP_002456070_Sorghum     -----LVYGDVWAKLGKR--QPMWPGVL
XP_003078017_O_tauri     -----VHGDVVFARASSRATEPLWPAVV
NP_191866_At_HDGFr_AT3G63070 -----EWKVGDLVLAKVKG---FPAWPAVV
NP_850485_At_HDGFr_At2g48160 -----GDLVLAKVKG---FPAWPAVV
XP_002880345_Alyrata     -----KWKVGDLVLAKVKG---FPAWPAVV
XP_002876705_Alyrata     -----KVGDLVLAKVKG---FPAWPAVV
XP_002465241_Sorghum     -----WKVGDLVLAKMKG---FPAWPAIV
XP_002463300_Sorghum     -----QWKVGDLVLAKMKG---FPAWPAIV
NP_197706_HUA2_At_HDGFr_AT5G23 -----QLVLGDLVLAKVKG---FPAWPAIV
XP_002872040_Alyrata     -----GQLILGDLVLAKVKG---FPAWPAIV
NP_196440_At_AT5G08230   -----GEMRLGDLVLAKVKG---FPAWPAIV
XP_002873347_Alyrata     -----LRLGDLVLAKVKG---FPAWPAIV
XP_002310078_Populus     -----QLRLGDLVLAKVKG---YPSWPAIV
XP_002306384_Populus     -----QLRLGDLVLAKVKG---YPSWPAIV
XP_002443678_Sorghum     -----REPQLGDLVLAKIKG---YPPWPAIV
XP_002974023_Selaginella -----QWKIGDLVLAKVKG---FPAWPAIV

```

XP\_002983468\_Selaginella -----QWKIGDLVLAKVKG---FPAWPAQV  
 XP\_002962776\_Selaginella -----EWSVGDLVLAKVKG---FPAWPAQV  
 XP\_001753837\_Physcomitrella -----REFNEGDLVLAKVKG---WPAWPAQA  
 XP\_001765392\_Physcomitrella -----REFNVGDLVLAKVKG---WPAWPAQ-  
 NP\_850170\_ATX1\_At2g31650 -----FEPGDIVWAKLAG---HAMWPAVI  
 XP\_002881186\_Alyrata -----FETGDIVWAKLAG---HAMWPAVI  
 NP\_172074\_ATX2\_AT1G05830 -----FEPRDI IWAKLTG---HAMWPAII  
 XP\_002889570\_Alyrata -----FEPRDI IWAKLTG---HAMWPAII  
 XP\_002301643\_Populus -----LEPGDI IWAKLTG---HAMWPAIV  
 XP\_002320433\_Populus -----PGDI IWAKVTG---HAMWPAIV  
 XP\_002459927\_Sorghum -----PGDLVWAKITG---HAMWPAVV  
 XP\_002992195\_Selaginella -----GTVVWAKVKG---WPMWPAIV  
 XP\_002982095\_Selaginella DELALLANEMESFEEQISHGTVVWAKVKG---WPMWPAIV  
 XP\_001767466\_Physcomitrella -----GDLVWAKVKG---WPMWPAFV  
 XP\_001780587\_Physcomitrella -----GDLVWAKVKG---WPMWPAFV  
 XP\_002975241\_Selaginella -----FQHGDIVWAEETPG---YPMWPAFV  
 XP\_001693149\_Chlamydomonas -----LRPGEVVWAQVRR---SAPWPAIV  
 XP\_001760849\_Physcomitrella -----FKHGQLVWAKFAR---FPWWPAEI  
 XP\_001751216\_Physcomitrella -----GQLVWAKFAR---FPWWPAEI  
 XP\_002961091\_Selaginella -----SAGQLVWAKFSR---SPWWPAQV  
 XP\_002966918\_Selaginella -----SAGQLVWAKFSR---SPWWPAQV  
 XP\_002444527\_Sorghum -----FRLGDI TWVKCSG---SSWWPAQV

XP\_002318650\_Populus FDPLGVTKYAVQ--SDQR---NGLLVGYLGC-----  
 XP\_002461281\_Sorghum YSAGGN-----G--TGHE---GQFLVSYFGDK-----  
 NP\_189424\_At\_AT3G27860 YDSL DADSLALK--TMQK---GKLLVAYFGDG-----  
 XP\_002875407\_Alyrata YDSL DADSLALK--TMQK---GKLLVAYFGDG-----  
 NP\_198850\_At\_AT5G40340 YDPSDASDLALK--IKQK---GKLLVACFGDG-----  
 XP\_002305994\_Populus YDPSNASDYAKK--VKQR---DKLLVAYFGDS-----  
 NP\_195915\_At\_AT5G02950 FDKSVASKAAMR--HFKK---GNVLVAYFGDC-----  
 XP\_002871003\_Alyrata IDASVASKAAKK--HFKKK---GNLLVAYFGDC-----  
 NP\_187578\_At\_At3g09670 FDASAATDKAKK--HFKK---GSFLVTYFGDC-----  
 XP\_002882633\_Alyrata FDASAATDKAKK--YFKK---GSFLVTYFGDC-----  
 XP\_002326168\_Populus FGRSDASKKAKK--YFKK---NSYLIAYFGDQ-----  
 XP\_002322856\_Populus FGCADASKKAKK--HFKK---DSYLIAYLGDQ-----  
 XP\_002315275\_Populus FDPDASEKAMR--YHKK---DCYLVAYFGDR-----  
 XP\_002439929\_Sorghum FDPDASELALK--HQKK---GSHLVAYFGDN-----  
 XP\_002440507\_Sorghum FDAADASADARA--LRRPR--GAVLVAYFWDK-----  
 NP\_187194\_At\_AT3G05430 FNEAFAS-PSVR--RVKKM--GYVLVAFFGDN-----  
 XP\_002882413\_Alyrata FNEAFAS-PSVR--RMKKM--GYVLVAFFGDN-----  
 XP\_002319529\_Populus FNEAFAS-SSVR--RTRRE--GHVLVAFFGDS-----  
 XP\_002330150\_Populus FNEAFAS-SSVR--RTRRE--GHVLVAFFGDS-----  
 NP\_198117\_At\_AT5G27650 FNEAFAS-PSVR--RMRI--DHVLVAFFGDS-----  
 XP\_002330341\_Populus -----RE--GHVLVAFFGDG-----  
 XP\_002439285\_Sorghum YSVNLT DDEEVH--RGYRD--GLVLVAFFGDS-----  
 XP\_002878409\_Alyrata IDPISQAPDGLV--KHCVP--GAICVMFFGYS-KDG-TQR  
 XP\_002878396\_Alyrata VDPISQAPDGLV--KHCVP--GAICVMFFGYS-KNG-TQR  
 NP\_191733\_ATX3\_WHCS1r\_AT3G6174 IDPISQAPDGLV--KHCVP--GAICVMFFGYS-KDG-TQR  
 XP\_002302629\_Populus IDPILQAPDAVL--SCCVP--GAICIMFYGYS-KNG-TQR  
 NP\_194520\_ATX4\_WHCS1r\_AT4G2791 IDPMTQAPLVL--RSCIP--DAACVFFGHGS-GNE-NER  
 XP\_002869532\_Alyrata IDPMTQAPLVL--RSCIP--DAACVFFGHGS-GNE-NER  
 NP\_200155\_ATX5\_At\_AT5G53430 IDPMTQAPLVL--RSCIP--DAACVFFGHGS-GTE-NER  
 XP\_002864242\_Alyrata IDPMTQAPLVL--RSCIP--DAACVFFGHGS-GTE-NER  
 XP\_002318412\_Populus IDPMTQAPLVL--RSCIA--DAACVFFGCS-GNDGDQR  
 XP\_002321418\_Populus IDPMTQAPLVL--RSCIA--DAACVFFGCS-GNDGNQR  
 XP\_002454931\_Sorghum IDPMQHAPVVL--NSCVP--GALCVMFFGYS-ANG-HGR

XP\_002961390\_Selaginella VDPIKEVPESVR--RKCVP--NRLCVMFYGESLARGVKRR  
XP\_002980880\_Selaginella VDPIKEVPESVR--RKCVP--NRLCVMFYGESLARGVKRR  
XP\_001777592\_Physcomitrella IDPFREAPPMVR--ELSLP--NSLCVMFYGPSKSKGKHSR  
XP\_002456070\_Sorghum IDPTQQVAADAMPQPRRV--AVLCVMLFGWCTEFS-DEK  
XP\_003078017\_O\_tauri VEPW-DAPEGVR--KQCEP--ESVCVMFLGPSATRGRAR  
NP\_191866\_At\_HDGFr\_AT3G63070 D-----EPEKWGHSADS--KKVTVHFFGT-----  
NP\_850485\_At\_HDGFr\_At2g48160 S-----EPEKWDASADS--KKVTVHFFGT-----  
XP\_002880345\_Alyrata S-----EPEKWGALTDL--KKVTVHFFGT-----  
XP\_002876705\_Alyrata S-----QPEKWGYSADS--KKVLVHFFGT-----  
XP\_002465241\_Sorghum S-----EPEQWKMPSTK--KKPLVYFYGT-----  
XP\_002463300\_Sorghum -----FIK--YSVHINIYRS-----  
NP\_197706\_HUA2\_At\_HDGFr\_AT5G23 S-----RPEDWDRAPDP--KKYFVQFFGT-----  
XP\_002872040\_Alyrata S-----RPEDWDRAPDP--KKYFVQFFGT-----  
NP\_196440\_At\_AT5G08230 G-----QPEDWNQAPDP--KKHFVQFFGT-----  
XP\_002873347\_Alyrata G-----QPEDWNQAPDP--KKHFVQFFGT-----  
XP\_002310078\_Populus S-----RPEDWKRADA--KKVTVHFFGT-----  
XP\_002306384\_Populus S-----RPEDWKRADA--KKVTVHFFGT-----  
XP\_002443678\_Sorghum S-----RPEDWQHKPTP--KKFFVYFYGT-----  
XP\_002974023\_Selaginella S-----RAEDFGRQNP--AKVTVHFFGT-----  
XP\_002983468\_Selaginella S-----RAEDFGRQNP--AKVTVHFFGT-----  
XP\_002962776\_Selaginella S-----KPEAFGQHHNP--ARVTVHFFGT-----  
XP\_001753837\_Physcomitrella EVSCFPQEIGKLETQKHA--GKYVTVYFGPG-----  
XP\_001765392\_Physcomitrella -----IGRLETQKHA--GKYVTVYFGPG-----  
NP\_850170\_ATX1\_At2g31650 VDESIIGERKGLNKNVSGGG--SLLVQFFGTH-----  
XP\_002881186\_Alyrata VDESVIGERKGLNKNVSGGG--SLLVQFFGTH-----  
NP\_172074\_ATX2\_At1G05830 VDESIVIKRGLNKNKISGGR--SVLVQFFGTH-----  
XP\_002889570\_Alyrata VDESIVIKRGLNKNKASGGR--SVLVQFFGTH-----  
XP\_002301643\_Populus VDGalIGHKGLS-KNIGGG--SISVQFFGTH-----  
XP\_002320433\_Populus VDEALIGHKGLS-KNIGGR--SVSVQFFGTH-----  
XP\_002459927\_Sorghum VDESNVPATRALK-SIRLDQ--SILVQFFGTH-----  
XP\_002992195\_Selaginella LDEE-HAEKCGLERPLKKS---TFAVQFFGSC-----  
XP\_002982095\_Selaginella LDEE-HAEKCGLERPLKKS---TFAVQFFGSC-----  
XP\_001767466\_Physcomitrella MDED-HAAACGME-PGKKG---MVPLQFFGYS-----  
XP\_001780587\_Physcomitrella MDED-HAAACGMD-PGKKG---MVPLQFFGYS-----  
XP\_002975241\_Selaginella MDDQ-HARLCNLE--ISTG---ELPVHYFGTY-----  
XP\_001693149\_Chlamydomonas ITRE-EAEREGLVGGSRGLGHNHQVFRFFGDY-----  
XP\_001760849\_Physcomitrella INERAFQPGTGGNRRSNTD----VLVRFVFGTY-----  
XP\_001751216\_Physcomitrella INEKAVIPGTGGNKRINAD----VLSKCF-IY-----  
XP\_002961091\_Selaginella ADEKSMSERT---RQSKNH----VLVRFVFGNY-----  
XP\_002966918\_Selaginella ADEKSMSERT---RQSKNH----VLVRFVFGNY-----  
XP\_002444527\_Sorghum IDELCVGSKP--KKKDKYD----CLVRLYGT-----

XP\_002318650\_Populus HIA-----WCLPSQLKPFHKDFEQMVVKN-----  
XP\_002461281\_Sorghum AFA-----WCDGAEALRPYEPYFVAELYD-----D  
NP\_189424\_At\_AT3G27860 SFFG-----WCNPLELKPFLNFKKFSKMS-----  
XP\_002875407\_Alyrata KFC-----WCNPLELKPFLNFKKFSKMS-----  
NP\_198850\_At\_AT5G40340 TFA-----WCGASQLKPFASFKECSKVS-----  
XP\_002305994\_Populus TFA-----WCNPSQLSPFEENFVEMFKQS-----  
NP\_195915\_At\_AT5G02950 TFA-----WNNASQIKPFHQNFSSMQEQS-----  
XP\_002871003\_Alyrata TFA-----WNNASQVQPFHQNFSSMQEQS-----  
NP\_187578\_At\_At3g09670 TFA-----WNEASRIKPFHQNFSSMAKQS-----  
XP\_002882633\_Alyrata TFA-----WNDASRVKPFHQNFSSMAKQS-----  
XP\_002326168\_Populus TFA-----WNEVSKIKPFRCNFSLLEKQS-----  
XP\_002322856\_Populus TFA-----WNEVSKIKPFRCNFSLLEKQS-----  
XP\_002315275\_Populus TFA-----WNEASLLKPFRRSHFSQVEKQS-----  
XP\_002439929\_Sorghum TFA-----WCDESQKPFVNTNYSQMEKQS-----

|                                |                                          |
|--------------------------------|------------------------------------------|
| XP_002440507_Sorghum           | TFA-----WNDAALLPFRAGF-----               |
| NP_187194_At_AT3G05430         | SYG-----WFDPAELIPFEPHVKEKSQQ-----T       |
| XP_002882413_Alyrata           | SYG-----WFDPAELLPFEPHVAENSQQ-----T       |
| XP_002319529_Populus           | SYG-----WFDPAELIQFDVNFAEKSQQ-----T       |
| XP_002330150_Populus           | SYG-----WFDPAELIPFDANFAEKSQQ-----T       |
| NP_198117_At_AT5G27650         | SYG-----WFDPAELIPFEPNLEEKSQQ-----T       |
| XP_002330341_Populus           | SYG-----WLDPTELVQFDSHYVEKSKQT-----N      |
| XP_002439285_Sorghum           | SYG-----WFEPSELVPFEDHFTEK-----           |
| XP_002878409_Alyrata           | DYA-----WVRQGMYPFTEFMDKFQDQTNLY----NY    |
| XP_002878396_Alyrata           | DYA-----WVRQGMVYPFTEFMDKFQDKTNLY----NY   |
| NP_191733_ATX3_WHCS1r_AT3G6174 | DYA-----WVRQGMVYPFTEFMDKFQDQTNLF----NY   |
| XP_002302629_Populus           | DYA-----WVKQGMVFPFAEFMERFQVQSQMF----KC   |
| NP_194520_ATX4_WHCS1r_AT4G2791 | DYA-----WVRRGMIFPFVDYVARFQEQLQ----GC     |
| XP_002869532_Alyrata           | DYA-----WVRRGMIFPFVDYVARFQEQSELQ----GC   |
| NP_200155_ATX5_At_AT5G53430    | DYA-----WVRRGMIFPFVDYVERLQEQSELR----GC   |
| XP_002864242_Alyrata           | DYA-----WVRRGMIFPFVDYVDRFQEQSELR----GC   |
| XP_002318412_Populus           | DYA-----WVQRGMIFPFDFVDRFQEQSELD----DC    |
| XP_002321418_Populus           | DYA-----WVQRGMIFPFMDFLDRFQEQSELD----DF   |
| XP_002454931_Sorghum           | DYG-----WVKQGMIFPFVDYLDRFQGGQP--LY----KL |
| XP_002961390_Selaginella       | DYA-----WVRKGMIFPFVDYLERFQSQTSEFN----KS  |
| XP_002980880_Selaginella       | DYA-----WVRKGMIFPFVDYLERFQSQTSEFN----KS  |
| XP_001777592_Physcomitrella    | DYA-----WVKQGMIFPFNAYLERFQSQTQLN----RS   |
| XP_002456070_Sorghum           | KYV-----WVRQGLIFPFSDYMDRFQGGTELS----SC   |
| XP_003078017_O_tauri           | DYC-----WATEERLAPYAR-AEALFAQKQVAK----RM  |
| NP_191866_At_HDGFr_AT3G63070   | QQIA-----FCNHGDVESFTEKKQSLLTRRH-----A    |
| NP_850485_At_HDGFr_At2g48160   | QQIA-----FCNPGDVEAFTEERKQSLLTRRH-----A   |
| XP_002880345_Alyrata           | QQIA-----FCNHTDVEAFTEERKQSLLTKRH-----A   |
| XP_002876705_Alyrata           | QQIA-----LCNPADVESFTEKKQLLLTKRH-----A    |
| XP_002465241_Sorghum           | KQIA-----FCNYADLEAFTEKKRSLLAKRH-----G    |
| XP_002463300_Sorghum           | QDIV-----EITPEQWDLPAAKKKSIVAKK-----      |
| NP_197706_HUA2_At_HDGFr_AT5G23 | EEIA-----FVAPPDIQAFTSEAKSKLLARC----QGK   |
| XP_002872040_Alyrata           | EEIA-----FVAPPDIQAFTSEAKSKLLARC----QGK   |
| NP_196440_At_AT5G08230         | GEIG-----FVTPPDIQPFTSETKKKLSARC----QGK   |
| XP_002873347_Alyrata           | QEIG-----FVAPPDIQPFTSEAKNKLARC----QGK    |
| XP_002310078_Populus           | QEIA-----FVAPSDIQVFTNEVKNKLSARC----QSK   |
| XP_002306384_Populus           | QEIA-----FVAPSDIQVFTNEVKNKLSARC----QSK   |
| XP_002443678_Sorghum           | EEIA-----FVPLADLEEFTEKTKNDLLDRAPNIKVQRK  |
| XP_002974023_Selaginella       | KQIR-----FCQHSEISAFTVEARAALHARTLS----KC  |
| XP_002983468_Selaginella       | KQIR-----FCQHSEISAFTVEARAALHARTLS----KC  |
| XP_002962776_Selaginella       | KQIR-----FCHHSEISKFTPEAKASLVAKAHS----KC  |
| XP_001753837_Physcomitrella    | QQIG-----WCLPVELSEFDADQREASIQKSLK----KT  |
| XP_001765392_Physcomitrella    | QQIG-----WCLPVELSEFDADQREASVQKSLK----KT  |
| NP_850170_ATX1_At2g31650       | DFAR-----IKVKQAISFIKGLLSPSHLKCKQP-----   |
| XP_002881186_Alyrata           | DFAR-----IKEKQAISFIKGLLSPSHLKCKQP-----   |
| NP_172074_ATX2_At1G05830       | DFAR-----IQVKQAVSFLKGLLSRSPKCKQP-----    |
| XP_002889570_Alyrata           | DFAR-----EDCHDFEPRDIIWAKLTGHA-----       |
| XP_002301643_Populus           | DFAR-----IKPKQAISFLKGLLSSFHLKCKQP-----   |
| XP_002320433_Populus           | DFAR-----YLSEQKLP-----                   |
| XP_002459927_Sorghum           | DFAR-----F-----                          |
| XP_002992195_Selaginella       | DFAR-----LNNDKIVTFFSKGVQLKYHSKCKRP-----  |
| XP_002982095_Selaginella       | DFAR-----LNNDKIVTFFSKGVQLKYHSKCKRP-----  |
| XP_001767466_Physcomitrella    | DHCR-----FSYKLVIFFSKGLMMKFHTKCKRV-----   |
| XP_001780587_Physcomitrella    | DHCR-----FSYKLVIFFSKGLMMKFHTKCKRV-----   |
| XP_002975241_Selaginella       | ESA-----                                 |
| XP_001693149_Chlamydomonas     | TVFA-----LPAISAGRIPD-----RGAVV-----      |
| XP_001760849_Physcomitrella    | DYG-----WVDPEVGLSEFDVKMQERSRIKKK-----    |
| XP_001751216_Physcomitrella    | GLGSDGKCSGWVDPKVGLESEFDVKLQERSKIKKK----- |



XP\_002961091\_Selaginella  
XP\_002966918\_Selaginella  
XP\_002444527\_Sorghum

NYG-----WVDPASDLSKFDVDFDGRSQVPTK-----  
NYG-----WVDPASDLSKFDVDFDGRSQVPTK-----  
QYL-----YVDPWKSNSEFEMMLKQENKSTME-----

XP\_002318650\_Populus  
XP\_002461281\_Sorghum  
NP\_189424\_At\_AT3G27860  
XP\_002875407\_Alyrata  
NP\_198850\_At\_AT5G40340  
XP\_002305994\_Populus  
NP\_195915\_At\_AT5G02950  
XP\_002871003\_Alyrata  
NP\_187578\_At\_At3g09670  
XP\_002882633\_Alyrata  
XP\_002326168\_Populus  
XP\_002322856\_Populus  
XP\_002315275\_Populus  
XP\_002439929\_Sorghum  
XP\_002440507\_Sorghum  
NP\_187194\_At\_AT3G05430  
XP\_002882413\_Alyrata  
XP\_002319529\_Populus  
XP\_002330150\_Populus  
NP\_198117\_At\_AT5G27650  
XP\_002330341\_Populus  
XP\_002439285\_Sorghum  
XP\_002878409\_Alyrata  
XP\_002878396\_Alyrata  
NP\_191733\_ATX3\_WHCS1r\_AT3G6174  
XP\_002302629\_Populus  
NP\_194520\_ATX4\_WHCS1r\_AT4G2791  
XP\_002869532\_Alyrata  
NP\_200155\_ATX5\_At\_AT5G53430  
XP\_002864242\_Alyrata  
XP\_002318412\_Populus  
XP\_002321418\_Populus  
XP\_002454931\_Sorghum  
XP\_002961390\_Selaginella  
XP\_002980880\_Selaginella  
XP\_001777592\_Physcomitrella  
XP\_002456070\_Sorghum  
XP\_003078017\_O\_tauri  
NP\_191866\_At\_HDGFr\_AT3G63070  
NP\_850485\_At\_HDGFr\_At2g48160  
XP\_002880345\_Alyrata  
XP\_002876705\_Alyrata  
XP\_002465241\_Sorghum  
XP\_002463300\_Sorghum  
NP\_197706\_HUA2\_At\_HDGFr\_AT5G23  
XP\_002872040\_Alyrata  
NP\_196440\_At\_AT5G08230  
XP\_002873347\_Alyrata  
XP\_002310078\_Populus  
XP\_002306384\_Populus  
XP\_002443678\_Sorghum  
XP\_002974023\_Selaginella

KARSFLGAVEKAVDE----  
GGEDFDAAVEASLDE----  
DSRRFLLAVEDA-----  
ESKRFLSAVEEA-----  
NSRSFLGAVEEAVEE----  
NSKSFVNAVKEAVDE----  
NSAEFRDAIDCALDE----  
NLAEFRDAIDCALDE----  
SLPDFIDAIDFALEE----  
SLPDFIDAIDFALEE----  
NLEDFHDAVHCALDE----  
NLEDFHDAVHCALDE----  
NSEVFNQNAVDCSLEE----  
TSDAFVGSVNNALEE----  
-----  
SSDHFAKAVEEAMNE----  
SSGHFAKAVEEAMDE----  
NSRTFIKAVEEATDE----  
NSRTFIRAVEEATDE----  
VSKHFVRAVEEAKDE----  
AKVFLIKAVEEADD-----  
-----  
KPSEFKKALEEAVLAENG-  
KPSEFKKALDEAVLAENG-  
KASEFNKALEEAVLAENGN  
KLSDFQVALEEEAILAESGF  
KPGNFQMALEEAFLADQGF  
KPGNFQMALEEAFLADQGF  
NPRDFQMALEEALLADQGF  
NPREFQMALEEALLADQGF  
KPGDFQMAVEEAFLAEQGF  
N-GDFQMAFEEAFLAEQGF  
RPSKFRAAIEEAFLAERGF  
QPGDFWSAIEEATLAEAG-  
QPGDFWSAIEEATLAEAG-  
RPVDFRQAISEAKLAD---  
KPADFRRAVEEAFLADQGF  
RPNAFNEACAEA-----  
KGSDFVRVAVKEITES----  
KGSDFVRVAVKEIIES----  
KGSDFLRVAVKEIIES----  
KGSDFVRVAVKEITES----  
KGADFLRAVDEIVE-----  
KLLVYFYGTKE-----  
TVKYFAQAVEQICTA----  
TVKYFAQAVEQICTA----  
TVKYFSQAVEEII-----  
TVKYFSQAVEEII-----  
KDRFFSQAVKEICAA----  
KDKFFSQAVKEICAA----  
YVQVFNDAVEQICKA----  
VPSDLKRAVKEICE-----

|                             |                     |
|-----------------------------|---------------------|
| XP_002983468_Selaginella    | VPSDLKRAVKEICE----- |
| XP_002962776_Selaginella    | TPADLRLAVSEIC-----  |
| XP_001753837_Physcomitrella | ADKKFISAVKEIC-----  |
| XP_001765392_Physcomitrella | ADKKFIFAVKEIC-----  |
| NP_850170_ATX1_At2g31650    | ---RFEEGMQEA-----   |
| XP_002881186_Alyrata        | ---RFEEGMQEA-----   |
| NP_172074_ATX2_AT1G05830    | ---RFEEAMEEA-----   |
| XP_002889570_Alyrata        | -----               |
| XP_002301643_Populus        | ---RFTRSLEEA-----   |
| XP_002320433_Populus        | -----               |
| XP_002459927_Sorghum        | -----               |
| XP_002992195_Selaginella    | ---AFDQGLRE-----    |
| XP_002982095_Selaginella    | ---AFDQGLRE-----    |
| XP_001767466_Physcomitrella | ---VFVQGLEEVE-----  |
| XP_001780587_Physcomitrella | ---VFVQGLEEVE-----  |
| XP_002975241_Selaginella    | -----               |
| XP_001693149_Chlamydomonas  | ---PFLSGL-----      |
| XP_001760849_Physcomitrella | ---AFQKGIEEALEY---- |
| XP_001751216_Physcomitrella | ---ALQKGIEEALEF---- |
| XP_002961091_Selaginella    | ---AFQKGLKEALEY---- |
| XP_002966918_Selaginella    | ---AFQKGLKEALEY---- |
| XP_002444527_Sorghum        | ---AFREVLEK-----    |

Multiple sequence alignment of PWWP-domain containing sequences. The multiple sequence alignment was used to reconstruct the neighbor joining (AF9) phylogeny.

```

3068_HDGF_NP_004485      KEYKCGDLVFAKMKGYPHWP-----ARI--D
50810_HDGF3P3_CCDS32314 REYKAGDLVFAKMKGYPHWP-----ARI--D
84717_HDGF2P2_UNQ785PRO1604 HAFKPGDLVFAKMKGYPHWP-----ARI--D
154150_HDGFL1_NP_612641  --YKSGDLVFAKLKGYAHWP-----ARI--E
XP_001634069_Nv         MTYQPGDLIWAKMRGYPHWP-----ARI--D
84656_GLYR1_NM_032569    --LRLGDLVWGKLGYPWP-----GKI--V
54904_b_WHSC1L1_NM_023034_MSH6 -KFQVGDVWVKVGTYPWWP-----CMVSSD
7468_b_WHSC1_NM_133330_MSH61 LKYNVGDVWVKVSGYPWWP-----CMVSAD
64324_b_NSD1_NM_172349_MSH61 LKYEVDLWAKFKRRPWWP-----CRICSD
152098_ZCWPW2_NP_001035522 ---PLGSLVLVKLQNWPSWP-----GILCPD
XP_001633052_Nv         SPFPTGAIWAKLAGYPWWP-----AMMEDD
7468_a_WHSC1_NM_133330_WHSCr --LHFQDIWVKLGNYRWWP-----AEVCHPKNV
64324_a_NSD1_NM_172349_WHSCr --PHYREIVWVKVGRYRWWP-----AEICHPRAV
54904_a_WHSC1L1_NM_023034_WHSC --LHYKQIVWVKLGNYRWWP-----AEICNPRSV
XP_001635219_Nv         --LLYGDIVWVKLGMYPWWP-----AMICNPRDV
XP_001747378_b_Mb       -----DVVWAKYGSYRWWP-----AVILSATEY
23613_ZMYND8_NM_183047   -----WF-C--EPCSN-----PHPLVWAKLKGf
10771_ZMYND11_NM_006624  -----WF-C--YPCIP-----NHELWAKMKGF
27154_BRPF3_NM_015695    --LEPLELVWAKCRGYPSYPALIIDPKMPREGLLHNGVPI
7862_BRPF1_NM_001003694 --LDALDLVWAKCRGYPSYPALIIDPKMPREGMFHHGVPi
23774_BRD1_NM_014577    --LEPLKVVWAKCSGYPSYPALIIDPKMPRVPGHHNGVTI
114825_PWWP2Aisob_NP_001124336 --ICVGDIVWAKIYGFPPWWP-----ARILTI
170394_PWWP2B_NM_138499  --VAVGDIVWVKIHGFPWWP-----ARVLDI
XP_001624451_Nv         --INEGSIWGVKHGHPWWP-----GRVMAI
1788_DNMT3A_NM_022552    --FGIGELVWVKLGFSSWWP-----GRIVSW
1789_DNMT3B_NM_006892    --FGIGDLVWVKIKGFSWWP-----AMVVSF
XP_001626231_Nv         -----GVLVWVKLKGYPWWP-----GRVVTY
NP_116242                --FEVGMLVWHKHKYPFWP-----AVVKSf
139221_MUM1L1_NM_152423  --FETGMIVWFKYQKYPFWP-----AVIKSI
728317_LOC728317_XP_001127165 --IERGTMVWFKFQDHPFWP-----AVVKSf
728307_LOC728307_XP_001127139 --IERGTMVWFKFQDHPFWP-----AVVKSf
55063_ZCWPW1_NM_017984   ASYIPGSIWAKQYGYPPWWP-----GMIESD
XP_001750279_Mb         --PQAWDFVWARMRGYPWYP-----AMLVNW
2956_MSH6_HSU54777       CDFSPPGDLVWAKMEGYPPWWP-----CLVYNH
XP_003084095_O_tauri    -----NQLVWAKLPGHPFWPG-----LRVNLET
XP_003079195_O_tauri    -----AVIP-----ESARTG

```

```

3068_HDGF_NP_004485      EMPEAAVKST-----ANKYQVFFFG-THETA
50810_HDGF3P3_CCDS32314 ELPEGAVKPP-----ANKYPIFFFG-THETA
84717_HDGF2P2_UNQ785PRO1604 DIADGAVKPP-----PNKYPIFFFG-THETA
154150_HDGFL1_NP_612641  HMTQ-----PNRYQVFFFG-THETA
XP_001634069_Nv         LAAKDEVIP-----AKKYPIFFYG-THETA
84656_GLYR1_NM_032569    NPPKDLKKPRG-----KRCFFVKFFG-TEDHA
54904_b_WHSC1L1_NM_023034_MSH6 PQLEVHTKIN-----TRGAREYHVQFFSNQPERA
7468_b_WHSC1_NM_133330_MSH61 PLLHSYTKLKG-----QKKSARQYHVQFFGDAPERA
64324_b_NSD1_NM_172349_MSH61 PLINTHSMKMKVS-----NRRPYRQYVEAFGDPSERA
152098_ZCWPW2_NP_001035522 RFKKGKYVTYDP-----DGNV-EEYHIEFLGDPHSRS
XP_001633052_Nv         PDYGYYYETDL-----DDRIPISYHVVFVGKDVSR
7468_a_WHSC1_NM_133330_WHSCr ---PPNIQK-----MKHEIGEFVFFFG-SKDYY
64324_a_NSD1_NM_172349_WHSCr ---PSNIDK-----MRHDVGEFVFFFG-SNDYL
54904_a_WHSC1L1_NM_023034_WHSC ---PLNIQG-----LKHDLGDFVFFFG-SHDYY
XP_001635219_Nv         ---PTNIQS-----MRHQGEFVVMFLG-SHDFY

```

XP\_001747378\_b\_Mb  
23613\_ZMYND8\_NM\_183047  
10771\_ZMYND11\_NM\_006624  
27154\_BRPF3\_NM\_015695  
7862\_BRPF1\_NM\_001003694  
23774\_BRD1\_NM\_014577  
114825\_PWWP2Aisob\_NP\_001124336  
170394\_PWWP2B\_NM\_138499  
XP\_001624451\_Nv  
1788\_DNMT3A\_NM\_022552  
1789\_DNMT3B\_NM\_006892  
XP\_001626231\_Nv  
NP\_116242  
139221\_MUM1L1\_NM\_152423  
728317\_LOC728317\_XP\_001127165  
728307\_LOC728307\_XP\_001127139  
55063\_ZCWPW1\_NM\_017984  
XP\_001750279\_Mb  
2956\_MSH6\_HSU54777  
XP\_003084095\_O\_tauri  
XP\_003079195\_O\_tauri

---PERCGQ-----SPAEGN-FLVKFLG-SNDVA  
PFWPAKALRDKD-----G-QVDAR-----FFG-QHDRA  
GFWPAKVMQKED-----N-QVDVR-----FFGHHHQRA  
PVPPLDVLKLG-----QKQAEAGEKLFVLVFFDNKRTWQ  
PVPPLDVLKLG-----QMTQEAREHLYLVVFFDNKRTWQ  
PAPPLDVLKIGE-----HMQTKSDEKLFVLVFFDNKRSWQ  
TVSRKDNGLL-----VRQEARISWFG-SPTTS  
SLGQKEDGEP-----SWREAKVSWFG-SPTTS  
TEVVDDQGG-----VDTFAHVTWFG-SNTSS  
WMTGRSRAA-----EGTRVWVWFG-DGKFS  
KATSKRQAM-----SGMRWVQWFG-DGKFS  
MEAGRPPPG-----PGNHVVKWFG-DNKFS  
RQRDKKASV-----LYIEGHMNPMMKGF  
RRKERKASV-----LFVEANMNSEKKG  
SNTDKTARV-----LLEANLHHGKRG  
SNTDKTARV-----LLEANLHHGKRG  
PDLGEYFLFTS-----HLDSLPSKYHVTFGETVSR  
QTPRDDLAECPVSDAVLKSQPSQDESSLVRFDDKTGSWA  
PFDGTFFIREKG-----KSVRVHVQFFDSDPTRG  
DFIPE DARKMS-----RDGEVLVFFFG-ENSFG  
GFASKVSD-----EHLRVVFFDDKHSFA

3068\_HDGF\_NP\_004485  
50810\_HDGF3\_CCDS32314  
84717\_HDGF2\_UNQ785PRO1604  
154150\_HDGFL1\_NP\_612641  
XP\_001634069\_Nv  
84656\_GLYR1\_NM\_032569  
54904\_b\_WHSC1L1\_NM\_023034\_MSH6  
7468\_b\_WHSC1\_NM\_133330\_MSH61  
64324\_b\_NSD1\_NM\_172349\_MSH61  
152098\_ZCWPW2\_NP\_001035522  
XP\_001633052\_Nv  
7468\_a\_WHSC1\_NM\_133330\_WHSCr  
64324\_a\_NSD1\_NM\_172349\_WHSCr  
54904\_a\_WHSC1L1\_NM\_023034\_WHSC  
XP\_001635219\_Nv  
XP\_001747378\_b\_Mb  
23613\_ZMYND8\_NM\_183047  
10771\_ZMYND11\_NM\_006624  
27154\_BRPF3\_NM\_015695  
7862\_BRPF1\_NM\_001003694  
23774\_BRD1\_NM\_014577  
114825\_PWWP2Aisob\_NP\_001124336  
170394\_PWWP2B\_NM\_138499  
XP\_001624451\_Nv  
1788\_DNMT3A\_NM\_022552  
1789\_DNMT3B\_NM\_006892  
XP\_001626231\_Nv  
NP\_116242  
139221\_MUM1L1\_NM\_152423  
728317\_LOC728317\_XP\_001127165  
728307\_LOC728307\_XP\_001127139  
55063\_ZCWPW1\_NM\_017984  
XP\_001750279\_Mb  
2956\_MSH6\_HSU54777

FLGPKDLFPYEESK--EKFGK---PNKRKGFSEGLWEIEN  
FLGPKDLFPYKEYK--DKFGK---SNKRKGFNEGLWEIEN  
FLGPKDLFPYDKCK--DKYK---PNKRKGFNEGLWEIQN  
FLSPKDLFPYKECK--EKFGK---PNKRKGFSAAGLWEIEN  
VMLPKDLFPYKHK--HKFAK---PCKRKFMEALVEIIVK  
WIKVEQLKPYHAHK--EEMIK---INKGRFQQAVDAVEE  
WVHEKRVREYKGHKQYELLAE--ATKQASNHSEKQKIRK  
WIFEKSLVAFEGEGQFEKLCQE--SAKQAPTAKAEKIKLLK  
WVAGKAIVMFEGRHQFEELP----VLRRRGKQKEK-GYRH  
WIKATFVGHYSITLKPEKCKN----KWKYKSALQEA--  
WVNSFSVRELTADDEEPEDIGNI--VVRKKNYKQLDDANG  
WTHQARVFPYMEGDRGSRYQGV--RGIGRVFKNALQEAEEA  
WTHQARVFPYMEGDVSSKDKMG--KGVDGTYKKALQEAAA  
WVHQGRVFPYVEGDK-SFAEQ--TSINKTFKALEEAAK  
WIHKGRVFSYQDGDGKTESGNN--KYLAKVFKKALVEAKE  
WVGHEIIPFNGDQ-----KNSYFTRNLKAAK  
WVPINNCYLMSKEIP-FSVKKT--KSIFNSAMQEMEVEY--  
WIPSENIQDITVNIHRLHVKRS--MG-WKKACDELELH--  
WLPRDKVLPLGVEDTVDKLML--EGRKTSIRKSVQVAYD  
WLPRTKLVPLGVNQDLDEKML--EGRKSNIRKSVQIAYH  
WLPKSKMVPLGIDETIDKLKMM--EGRNSSIRKAVRIAFD  
FLALSQLSPFLENFQSRFNK-----KRKGLYRKAITAAK  
FLSISKLSPFSEFFKLRFNK-----KKGMYRKAITAAN  
EMPVQELQDFEPNFRRRYK-----DKKGCYRRAVRQAQE  
VVCVEKLMPLSS-FCSAFHQAT--YKQPMYRKAIYEVLQ  
EVSADKLVALLGL-FSQHFNLAT--FNKLVSYRKAMYHALE  
QVTYDITVLPFAE-FKSNFLVTK--MKG--LYKKAVALDALE  
TVSLKSLKHFDCKEKQTLN-----AREDFNQDIGWC--  
RVNFRRLKFKFDCKEKQMLVDK-----AREDYSESIDWC--  
QVPLRRLKHLDCKEKEKLLK-----AQKAYKQSVNWC--  
QVPLRRLKHLDCKEKEKLLK-----AQKAYKQSVNWC--  
WIPVNMMLKNFQELSLELSVMKK--RRNDCSQKLGVALMMA  
WVTSQVMRMFASAWVDAQMLS--QTSKHAKDVFRSLFE  
WVSKRLLKPYTGSKSKEAQKGGHFYSAPPEILRAMQRADE

XP\_003084095\_O\_tauri  
XP\_003079195\_O\_tauri

WVREENCLDFSEHYESKSRDP---ARNKSRFQAALKQAND  
WVKKSKVYPFCTFYAEAMKQPM--FTARSTFTRMIDRA--

3068\_HDGF\_NP\_004485  
50810\_HDGF3\_CCDS32314  
84717\_HDGF2\_UNQ785PRO1604  
154150\_HDGFL1\_NP\_612641  
XP\_001634069\_Nv  
84656\_GLYR1\_NM\_032569  
54904\_b\_WHSC1L1\_NM\_023034\_MSH6  
7468\_b\_WHSC1\_NM\_133330\_MSH61  
64324\_b\_NSD1\_NM\_172349\_MSH61  
152098\_ZCWPW2\_NP\_001035522  
XP\_001633052\_Nv  
7468\_a\_WHSC1\_NM\_133330\_WHSCr  
64324\_a\_NSD1\_NM\_172349\_WHSCr  
54904\_a\_WHSC1L1\_NM\_023034\_WHSC  
XP\_001635219\_Nv  
XP\_001747378\_b\_Mb  
23613\_ZMYND8\_NM\_183047  
10771\_ZMYND11\_NM\_006624  
27154\_BRPF3\_NM\_015695  
7862\_BRPF1\_NM\_001003694  
23774\_BRD1\_NM\_014577  
114825\_PWWP2Aisob\_NP\_001124336  
170394\_PWWP2B\_NM\_138499  
XP\_001624451\_Nv  
1788\_DNMT3A\_NM\_022552  
1789\_DNMT3B\_NM\_006892  
XP\_001626231\_Nv  
NP\_116242  
139221\_MUM1L1\_NM\_152423  
728317\_LOC728317\_XP\_001127165  
728307\_LOC728307\_XP\_001127139  
55063\_ZCWPW1\_NM\_017984  
XP\_001750279\_Mb  
2956\_MSH6\_HSU54777  
XP\_003084095\_O\_tauri  
XP\_003079195\_O\_tauri

N-----  
N-----  
N-----  
N-----  
N-----  
FL-----  
PRPQRERAQWDIGIAHAEKALKMTR  
PISGKLRQWEMGIQAEAAASMSV  
KVPQKILSKWEASVGLAE-----  
-----  
QARQALSPLVQERLAV-----  
RFREI-----  
RFEEL-----  
RFQEL-----  
KYDEW-----  
SFQE-----  
-----  
-----  
RAMIH-----  
RALQH-----  
RAMNH-----  
AA-----  
AA-----  
TL-----  
VA-----  
KA-----  
VL-----  
-----  
-----  
-----  
QEAEQISI-----  
-----  
ALNKDKIKRLELAV-----  
E-----  
-----
