# Supplementary material for: Evolution of the PWWP-domain encoding genes in the plant and animal lineages
Source: PubMed Central journal article supplement (PMC3457860; doi:10.1186/1471-2148-12-101), 2012-06-26
Supplement: 1471-2148-12-101-S8.pdf [file 1471-2148-12-101-S8.pdf]

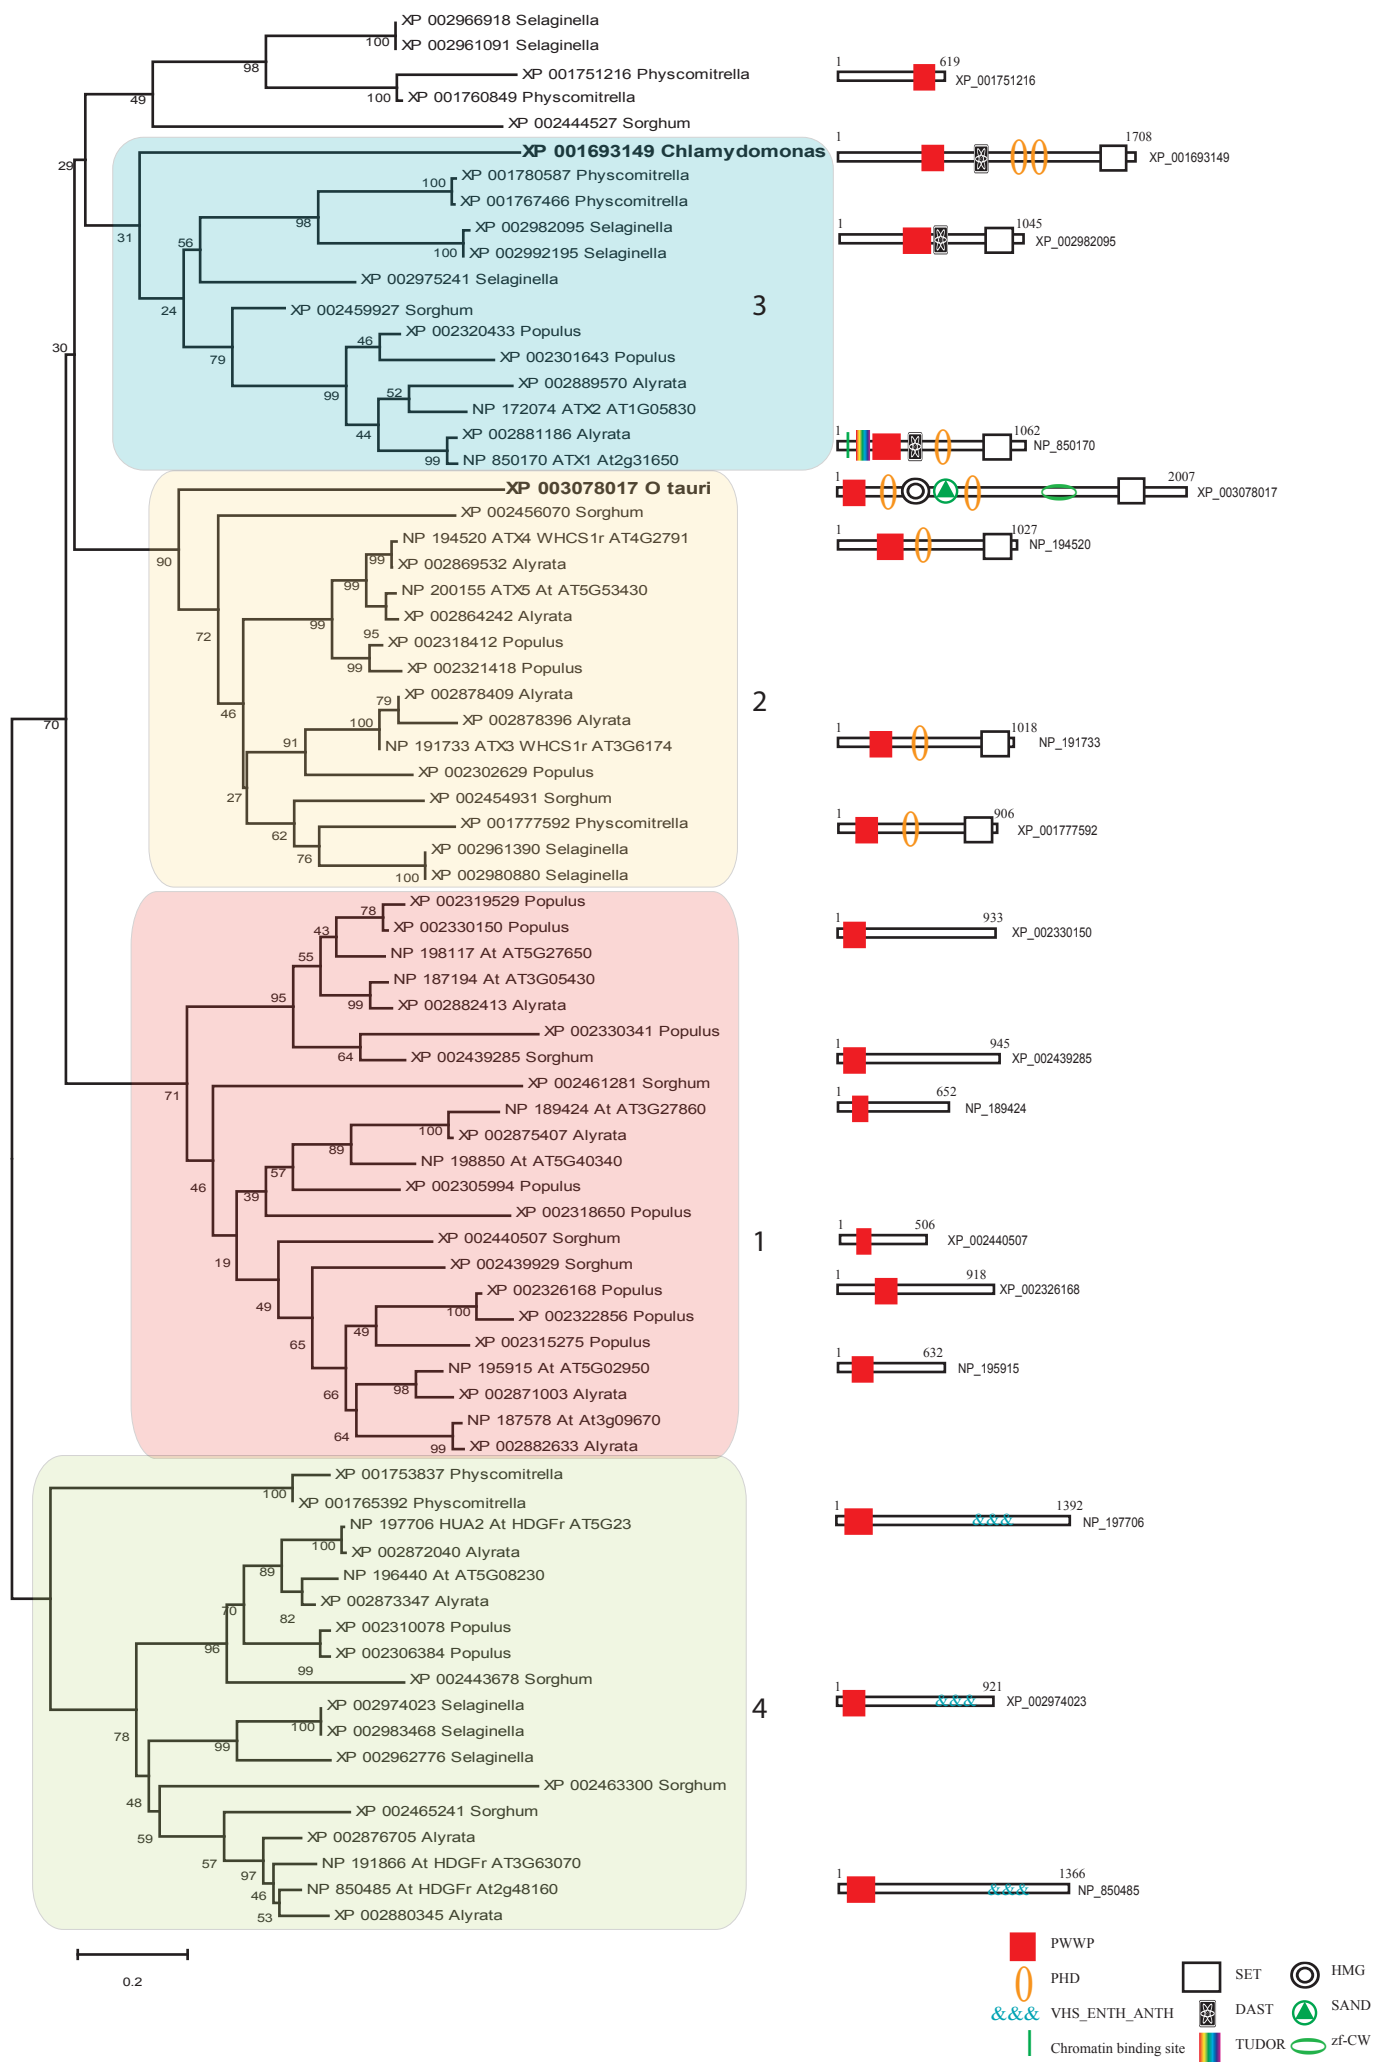

Additional File 8. Neighbor-Joining phylogeny of PWWP containing proteins in plants including the ATX3-like protein from *O. tauri* and the ATX1-like protein of *Chlamydomonas*. The tree was constructed as described in Additional file 5. Phylogenetic analyses were conducted in MEGA4.
